# Supplementary material for: Genome sequencing of the sweetpotato whitefly Bemisia tabaci MED/Q
Source: PubMed Central journal article supplement (PMC5467035; doi:10.1093/gigascience/gix018), 2017-03-15
Supplement: gix018_GIGA-D-16-00061_Revision_1.pdf [file gix018_GIGA-D-16-00061_Revision_1.pdf]

For consideration:

*Giga Science*

---

## The invasive Q-type *Bemisia tabaci* genome: a tale of gene loss and gene gain

### Authors and affiliations

Wen Xie<sup>1¶</sup>, Chunhai Chen<sup>2¶</sup>, Zezhong Yang<sup>1¶</sup>, Litao Guo<sup>1¶</sup>, Xin Yang<sup>1¶</sup>, Dan Wang<sup>2</sup>, Ming Chen<sup>2</sup>, Jinqun Huang<sup>2</sup>, Yanan Wen<sup>1</sup>, Yang Zeng<sup>1</sup>, Yating Liu<sup>1</sup>, Jixing Xia<sup>1</sup>, Lixia Tian<sup>1</sup>, Hongying Cui<sup>1</sup>, Qingjun Wu<sup>1</sup>, Shaoli Wang<sup>1</sup>, Baoyun Xu<sup>1</sup>, Xianchun Li<sup>4</sup>, Xinqiu Tan<sup>5</sup>, Murad Ghanim<sup>6</sup>, Huipeng Pan<sup>3</sup>, Shunxiang Ren<sup>7</sup>, Baoli Qiu<sup>7</sup>, Dong Chu<sup>8</sup>, Helene Delatte<sup>9</sup>, M. N. Maruthi<sup>10</sup>, Feng Ge<sup>11</sup>, Xueping Zhou<sup>12</sup>, Xiaowei Wang<sup>13</sup>, Fanghao Wan<sup>12</sup>, Yuzhou Du<sup>14</sup>, Chen Luo<sup>15</sup>, Fengming Yan<sup>16</sup>, Evan L. Preisser<sup>17</sup>, Xiaoguo Jiao<sup>18</sup>, Brad S. Coates<sup>19</sup>, Jinyang Zhao<sup>2</sup>, Qiang Gao<sup>2</sup>, Jinqun Xia<sup>2</sup>, Ye Yin<sup>2\*</sup>, Yong Liu<sup>5\*</sup>, Judith K. Brown<sup>4\*</sup>, Xuguo "Joe" Zhou<sup>3\*</sup>, Youjun Zhang<sup>1\*</sup>

**1** Institute of Vegetables and Flowers, Chinese Academy of Agricultural Science, Beijing 100081, China, **2** BGI-Shenzhen, Shenzhen 518083, China, **3** Department of Entomology, S-225 Agricultural Science Center North, University of Kentucky, Lexington, KY 40546-0091, USA, **4** School of Plant Sciences, University of Arizona, Tucson, AZ 85721, USA, **5** Institute of Plant Protection, Hunan Academy of Agricultural Sciences, Changsha 410125, China, **6** Department of Entomology, Volcani Center, Bet Dagan 5025001, Israel, **7** Key Lab of Bio-pesticide Creation and Application, South China Agricultural University, Guangzhou 510642, China, **8** College of Agronomy and Plant Protection, Qingdao Agricultural University, Qingdao 266109, China, **9** Cirad, UMR PVBMT, Saint-Pierre, La Re´union, France, **10** Natural Resources Institute, University of Greenwich, Chatham Maritime, Kent ME4 4TB, UK, **11** Institute of Zoology, Chinese Academy of Sciences, Beijing 100101, China, **12** Institute of Plant Protection, Chinese Academy of Agricultural Sciences, Beijing 100193,

1  
2  
3  
4  
5  
6  
7  
8  
9  
10  
11  
12  
13  
14  
15  
16  
17  
18  
19  
20  
21  
22  
23  
24  
25  
26  
27  
28  
29  
30  
31  
32  
33  
34  
35  
36  
37  
38  
39  
40  
41  
42  
43  
44  
45  
46  
47  
48  
49  
50  
51  
52  
53  
54  
55  
56  
57  
58  
59  
60  
61  
62  
63  
64  
65

China, **13** Ministry of Agriculture Key Laboratory of Agricultural Entomology, Institute of Insect Sciences, Zhejiang University, Hangzhou 310058, China, **14** School of Horticulture and Plant Protection and Institute of Applied Entomology, Yangzhou University, Yangzhou 225009, China, **15** Institute of Plant and Environment Protection, Beijing Academy of Agriculture and Forestry Sciences, Beijing 100089, China, **16** Collaborative Innovation Center of Henan Grain Crops, College of Plant Protection, Henan Agricultural University, Zhengzhou 450002, China, **17** Department of Biological Sciences, University of Rhode Island, Kingston, Rhode Island 02881, USA, **18** College of Life Sciences, Hubei University, Wuhan 430062, China. **19** United States Department of Agriculture, Agricultural Research Service, Corn Insects & Crop Genetics Research Unit, Ames, IA 50011, USA.

---

¶These authors contributed equally to the work.

\*To whom correspondence should be addressed. Email: Youjun Zhang (zhangyoujun@caas.cn), Ye Yin (yinye@genomics.cn), Xuguo "Joe" Zhou (xuguozhou@uky.edu), Judith K. Brown (JBrown@ag.arizona.edu), Yong Liu (haoasliu@163.com).

## Abstract

**Background:** The whitefly *Bemisia tabaci* is a highly destructive agricultural and ornamental crop pest. It damages host plants through both phloem feeding and vectoring plant pathogens. Introductions of *B. tabaci* are difficult to quarantine and eradicate because of its high reproductive rates, broad host plant range, and insecticide resistance.

**Results:** A 658 Mb draft genome for *B. tabaci* MED/Q was assembled and annotated with 20,786 protein-coding genes. The cytochrome P450 monooxygenases and several other metabolic pathways contained an expanded number of gene family members. The amino acid biosynthesis pathways are partitioned among the host and endosymbiont genomes in a manner distinct from other hemipteran genomes. Evidence of horizontal gene transfer to the host genome may explain their obligate relationship. Putative loss-of-function of the immune deficiency signaling pathway due to the gene loss is a shared ancestral trait among hemipteran insects.

**Conclusions:** The expansion of P450 gene family members may contribute to the insecticide tolerance of MED/Q and facilitate its invasion in intensively-managed crop systems. This whitefly genome provides the foundation for research into the evolution of endosymbiotic relationships, as well as the mechanism(s) providing a competitive advantage to invasive species; both factors likely contribute to the worldwide success of *B. tabaci*.

## Keywords

*Bemisia tabaci*, Detoxification enzymes, Genome, Gene gain and loss, Invasive species, Symbiosis

## Background

As a globally invasive species, the phloem-feeding whitefly *Bemisia tabaci* (Genn.; hereafter '*Bemisia*') has been found on all continents except Antarctica [1,2]. Taxonomically, *B. tabaci* is considered a species complex that contains several morphologically-indistinguishable but genetically-distinct 'cryptic species' [2-7]. The members of this complex predominantly feed on herbaceous eudicot plant species [8]; they have been reported on over 900 species, including a large number of food, fiber, and/or ornamental crops (Global Invasive Species Database). While they can inflict significant feeding-related damage, their larger impact on plant health occurs via their role as a vector for over 111 plant viruses [9,10].

Accidental introductions of *Bemisia* into previously whitefly-free regions has harmed agricultural productivity and led to its classification as one of the World's Worst Invasive Species (Global Invasive Species Database: <http://www.issg.org/database/welcome/>). The *Bemisia* Middle East-Asia Minor 1 (MEAM1, or 'B') cryptic species is highly invasive and has emerged as a major pest in the United States, Caribbean Basin, Latin America, Middle East [1], and East Asia [11]. Similarly, the invasive *Bemisia* Mediterranean (MED, or 'Q') cryptic species has been introduced into several geographic locations and become established throughout China [12,13]. Although both MEAM1/B and MED/Q are successful invasives, they prefer different host species, vary in their response to virally-infected plants [13,14], and differ in their ability to vector *tomato yellow curl leaf virus* ('TYLCV') [12,15] and other plant viruses. The success of MEAM1/B as an invasive may be related to its high ratio of diploid female to haploid male progeny, a reproductive advantage which allows it to outnumber and competitively displace native *Bemisia* cryptic species [16]. In contrast, the MED/Q cryptic species is resistant to several classes of chemical insecticides, providing it a substantial advantage in agricultural and other managed landscapes [12]. Because of their invasive nature and impact on agricultural production, the MEAM1/B and MED/Q cryptic species have been extensively studied and proposed as model species for exploring range expansion through adaptations to invaded habitats. Despite substantial research, however, the genetic or genomic basis for the adaptive plasticity and selective advantages of both *Bemisia* cryptic species remain obscure.

*Bemisia* and other phloem-feeding hemipterans rely upon obligate bacterial endosymbionts to provide the essential amino acids and vitamins lacking in plant sap. While all *Bemisia* cryptic species rely on the primary endosymbiont *Candidatus (Ca.) Portiera aleyrodidarum* (*Portiera*) [17], some also harbor one or more facultative bacterial endosymbionts whose role in host survival is unknown [18,19]. The *Bemisia*-bacteria symbiosis has evolved a cross-linked set of systems for supplying enzymatic components to key metabolic pathways. The adaptive changes in host immune pathways and pathogen detection, and the mechanisms by which endosymbionts evade these defenses, remain poorly understood. Moreover, variation in endosymbiont communities within *Bemisia* is associated with distinct host haplotypes, and increasing evidence suggests that these endosymbiont communities may influence the competency of different *Bemisia* to vector TYLCV [20].

We report the first draft genome sequence for *Bemisia* MED/Q. We focus on pathways for pathogen recognition and several metabolic pathways that contain a large and highly diverse gene members to shed light on the polyphagous nature of MED/Q, its resistance to insecticide, and the evolutionary underpinnings of its symbiosis. The MED/Q genome provides a resource for future investigations that address climatic and host plant adaptations, invasive-invasive and native-exotic interactions, insecticide resistance, vector competence, and its relationships with bacterial endosymbionts.

## Data Description

For details on assemblies, annotations and other analyses see ‘methods’ section. This whole genome shotgun project has been deposited at DDBJ/EMBL/GenBank under the accession LIED000000000. The version described in this paper is version LIED01000000. The final, assembly *Portiera* (PRJNA299729/SAMN04214819/LNJY000000000) and *Hamiltonella* (PRJNA299727/SAMN04214805/LNJW000000000) genome of MED/Q, respectively, are accessible at NCBI.

## Analyses

### Genome sequencing and assembly

Results of mtCOI gene PCR-RFLP assays [21], and direct DNA sequencing followed by phylogenetic evaluation against reference sequences [22] both confirmed that the *Bemisia* in the MED/Q colony belonged to the Q1 haplotype group, or western Mediterranean region clade (data not shown). Using genomic DNA from the MED/ colony, a total of 20 whole genome sequence (WGS) shotgun sequencing libraries were generated (18 pooled male and female PE and MP libraries, and two haploid-male derived WGA PE libraries), from which sequences were generated on an Illumina HiSeq2500 platform. Library sequencing produced a total of 428.2 Gb or an approximate 594.7-fold genome coverage assuming a 0.72 Gbp genome size (based on 17-mer analysis). For the 10 short-insert PE libraries, there were a total of 229.4 gigabases (Gb) (100 bp or 150 bp read length, approximately 318.6-fold genome coverage). Sequencing the eight large-insert (>1 kb) MP libraries produced 80.3 Gb of reads (49 bp read length, 111.5-fold coverage) for use in scaffold construction (S1 Table). The two male WGA libraries produced a total of 118.5 gigabases (Gb) of data (S1 Table) or approximately 164.6-fold genome coverage. Sequencing of 13 BAC pools generated 362.6 Gbp of raw data (288.4 Gbp processed data; results not shown). The subsequent assembly of this sequence data using our pipeline (S1 Fig) generated a 658.0 Mbp draft genome assembly for MED/Q, with a scaffold N50 of 437 kb (Table 1). The assembled 658 Mb MED/Q draft genome size is consistent with recent flow cytometry estimates [23]. The mean read depth across 10 kb windows indicated that all genome regions were highly represented within the read data, with < 1.5% having a depth of < 10X (remaining data not shown).

### Annotation of repetitive elements

Homology-based annotation of MED/Q repetitive elements was queried against Repbase v.20.05 [24] with RepeatMasker [25]. We found a total of 299.0 Mbp repetitive DNA, or 45.4% of the MED/Q genome size. This was about 10% higher than the repeat contents of *Acyrtosiphon pisum* and *Rhodnius prolixus*, but less than that of *Nilaparvata lugens* (48.6%). As in *N. lugens*, transposon elements (TEs) in MED/Q were primarily responsible for the repeat content difference (48.6% and 45.4%, respectively). This suggests that long terminal repeat (LTR)-like retroelements (18.5%) are more abundant and contain more nucleotides than all other TE classes. This proliferation of LTR retrotransposons has only been found in one other Hemipteran genome, that of *N. lugens* (12.29%). The MED/Q genome also contains the high proportion of the DNA-transposon TEs (12.92%) found in other fully-described Hemipteran genomes. As with both *N. lugens* (0.5%) and *R. prolixus* (0.01%), the MED/Q genome also appears devoid of short interspersed nuclear elements (SINEs; 0.96%). These other Hemipteran genomes also contain a small amount of long interspersed nuclear elements (LINEs; *A. pisum*: 2.6%; MED/Q: 3.18%; *R. prolixus*: 3.2%),

1 but *N. lugens* (12.84%). This suggests that MED/Q-specific TEs, especially the LTRs, have  
2 evolved relatively recently and contribute to the large number of gene sets (S2 Table).  
3

### 4 **Gene coverage and annotation of coding regions**

5  
6 Preliminary evaluation of transcribed regions within the draft MED/Q genome assembly  
7 coverage found that ~95.2% of *B. tabaci* ESTs > 200 bp were present, with 90,652 ESTs  
8 showing ≥ 90% length coverage on one scaffold (S15 Table). This alignment encompassed  
9 92.9% of nucleotides within the EST dataset. Analogously, 229 (96%) of the 248 sequences  
10 in the CEGMA gene set were present in the MED/Q genome assembly, fewer than the 245  
11 and 236 obtained from *A. pisum* and *R. prolixus* genomes, respectively (remaining data not  
12 shown). The final GLEAN gene models predicted a reference gene set of 20,786 protein-  
13 coding genes, a consensus result derived from *de novo*, orthology, and evidence (RNA-seq)-  
14 based prediction methods (S3 Table) and integrated into GLEAN gene models (S4 Table).  
15 Among the GLEAN gene models, 16,622 (79.97%) received functional gene annotations  
16 using the various databases queried in our analysis pipeline (S5 Table). 57% of the un-  
17 annotated GLEAN gene models were supported by either RNA-seq or EST sequence data  
18 (remaining data not shown).  
19  
20  
21  
22  
23

### 24 **Prediction of gene orthology and gene family expansion**

25  
26 Phylogenetic analysis based on orthologs across 14 arthropod taxa (S6 Table) suggested that  
27 MED/Q is clustered into a hemipteran clade containing *A. pisum*, and is a sister lineage to a  
28 clade containing both *R. prolixus* and *N. lugens* (Fig 1A). The range of species-specific genes  
29 within the four hemipteran genomes ranged from 38-60%, with higher values for the three  
30 phloem-feeding specialists. This led us to investigate interspecific changes in the number and  
31 diversity of gene family members (orthologs and paralogs) within this group of Hemiptera  
32 (Fig 1C; Fig S2). We found that 1,978 gene models unique to MED/Q were associated with  
33 putative gene family expansions, with the largest expansions occurring in gene families  
34 linked to transmembrane transport and oxidative-reduction processes (S7 Table). The number  
35 of MED/Q gene family members among the UDP glycosyltransferases (UGTs;  $n = 63$ ),  
36 carboxyl/choline esterases (COE;  $n = 51$ ), and ATP-binding cassette transporters (ABC;  $n =$   
37 59) was not significantly different from those found in other phloem- or blood-feeding  
38 arthropods. In contrast, the cytochrome monooxygenase P450 detoxification gene family was  
39 significantly expanded (Fig 2A). The 56 expansions in the MED/Q P450s gene family are the  
40 most seen in any Hemipteran genome, and second only to *T. castaneum* ( $n = 68$ ) among the  
41 14 fully-sequenced arthropod genomes (S8 Table). These expansions have produced 153  
42 predicted MED/Q P450 genes, with the most expansion occurring in the CYP3 and CYP4  
43 clades; this is the greatest number found in any arthropod genome (Fig 2B).  
44  
45  
46  
47

48 We also found 3,474 genes belonging to groups that show putative reductions in the  
49 number of gene family members; these were mainly annotated as being involved in RNA-  
50 dependent DNA replication and DNA integration (e.g., difference in transposon component of  
51 the genomes), and cell surface receptor signaling (e.g., immune response; S9 Table). Further  
52 inspection of gene annotation information showed that genes in the immune deficiency  
53 (IMD) pathway were absent from the MED/Q genome (Fig 3; S10 Table).  
54  
55  
56

### 57 **Metagenomics and analysis of MED/Q endosymbiosis**

58  
59 The bacterial metagenome of insects has been shown to contribute to the overall fitness and  
60 viability of insects. Many hemipterans have evolved bacteriocytes, the specialized structures  
61  
62  
63  
64  
65



1 that house endosymbiotic bacteria. Although genomes are available for both the primary  
2 MED/Q endosymbiont, *Ca. Portiera* aleyrodidarum (CP003867, CP003835 and CP007563)  
3 and secondary endosymbiont, *Hamiltonella* (AJLH00000000, AJLH02000000) [17,19], the  
4 lack of a corresponding whitefly genome sequence has precluded investigations into this  
5 interaction with respect to metabolic and gene pathway partitioning. We used a metagenomics  
6 approach to re-assemble the complete genomes of *Portiera* (0.35 Mb) and *Hamiltonella* (1.8  
7 Mb) from filtered Illumina reads generated from shotgun sequencing libraries.

8 We used the MED/Q and endosymbiont genomes to compare gene models whose  
9 functional annotations suggest their involvement in amino acid biosynthesis and to  
10 reconstruct the corresponding enzymatic pathways. This revealed a tight relationship between  
11 MED/Q and *Portiera*. There were 47 MED/Q and 45 *Portiera* enzymes involved in amino  
12 acid biosynthesis encoded in the two genomes; the intact pathway requires enzymatic  
13 components encoded by both genomes. Pathway analysis showed that both genomes are  
14 needed to produce ten essential amino acids; Arg, His, Ile, Leu, Lys, Met, Phe, Try Thr, and  
15 Val (Fig 4). While MED/Q encodes enzymes that contribute precursor substrates for Trp, Phe  
16 and Thr synthesis, *Portiera* encodes enzymes required to complete the synthesis of these  
17 amino acids. Conversely, *Portiera* provides intermediates required by MED/Q to synthesize  
18 Arg, His, Ile, Leu, Lys, Met, Tyr, and Val (Fig 4A). Our analysis of analogous amino acid  
19 biosynthesis pathways found that MED/Q and its *Hamiltonella* endosymbiont are both  
20 capable of synthesizing Cys, Lys, Pro, and Thr (Fig 5). Comparative genomic pathway  
21 analysis also showed that MED/Q lacks the capacity to synthesize five B-class vitamins;  
22 biotin, folate, NAD, riboflavin, and vitamin B6. We predict that the *Hamiltonella* genome  
23 encodes enzymes necessary for the biosynthesis of these B vitamins (S11 Table; S12 Table).

24 We used a phylogenetic approach to test the hypothesis that horizontal gene transfer  
25 (HGT) was involved in the gain of certain amino acid biosynthetic pathways. Our results  
26 suggest that the MED/Q genome contains *Portiera*-derived endosymbiotic bacterial genes.  
27 The phylogenetic pipeline we used for HGT detection identified 11 putative events based on  
28 phylogenetic clustering of MED/Q genes with bacterial counterparts (Fig S3). In ten of these  
29 11 predicted HGT events the clusters of MED/Q encoded genes were most closely related to  
30 their bacterial orthologs. In the other instance, the MED/Q gene for argininosuccinate  
31 synthase was at the base of a bacterial-origin clade and adjacent to a second insect-derived  
32 clade (Fig S3A). Functional annotations suggest that six HTG events (those involving argH, 2  
33 dapF paralogs, lysA, dapB, and E3.1.3.15B) are likely involved in the complementation of  
34 the Arg, His, and Lys biosynthetic pathways (Fig 4A). Six MED/Q genes involved in these 11  
35 putative HTG events contained introns and four had a 5'-untranslated region (UTR), in spite  
36 of the fact that their closest evolutionary relationships were to prokaryotic orthologs (S13  
37 Table). Comparisons between amino-acid synthesis pathways in the MED/Q-*Portiera*, *A.*  
38 *pisum*-*Buchnera* and *N. lugens*-yeast-like host-endosymbiont relationships suggest that  
39 MED/Q endosymbionts play an essential role in the production of seven essential amino  
40 acids (Fig 4B). By comparison, the genome sequences of the MED/Q counterpart aphid- and  
41 planthopper-endosymbiont study systems primarily encode transaminases (S14 Table), and  
42 provide either substrates or intermediates involved in the regulation of amino acid synthesis.  
43 While aphid and planthopper endosymbionts have a role in glycolysis and the pentose  
44 phosphate pathway, *Portiera* lacks a detectable role in either pathway (Fig 4A,C).

### 54 **Functional validation of genes encoding detoxification enzymes**

55 The numbers of exons in the CYP4 subfamily (CYP304G2, CYP402C9, CYP4R2 and  
56 CYP4G69) range from six to ten, but all of the CYP6 subfamily (CYP6CX4, CYP6DB3,  
57 CYP6DV6, CYP6DW2 and CYP6EM1) contain six exons (Fig 6A, C). The involvement of  
58  
59  
60

1 genes encoding 9 CYP450s and 3 GSTs in imidacloprid resistance was validated using *in vivo*  
2 dietary RNA interference (RNAi). The efficiency of dietary RNAi was shown in Figure S5.  
3 The susceptibility of *B. tabaci* controls and knockouts to 0.2mM imidacloprid was  
4 documented in Figure 6. In CYP4 subfamily, the median survival rate of dsEGFP controls  
5 was 63%. In contrast, the median survival rate of CYP4 subfamily knockouts, including  
6 CYP304G2, CYP402C9, CYP4CR2, and CYP4G69, was 63, 59, 63, and 47%, respectively  
7 (Fig 6B). A log-rank test analysis showed that while the survival of CYP304G2 and  
8 CYP4CR2 knockouts did not differ from the controls, survival of CYP402C9 and CYP4G69  
9 knockouts was significantly lower. In CYP6 subfamily, the median survival rate of  
10 CYP6CX4, CYP6DB3, CYP6DV6, CYP6DW2, and CYP6EM1 knockouts was 59, 47, 59,  
11 63, and 41%, respectively (Fig 6D). Log-rank analysis revealed that the silencing of  
12 CYP6CX4, CYP6DB3, and CYP6DV6 significantly decreased survivorship, while silencing  
13 of CYP6DW2 did not affect survival rate. For GSTs, the median survival rate of GSTM1,  
14 GSTD9, and GSTD6 knockouts was 59, 59, and 72% (Fig 6F); suggesting that the silencing  
15 of GSTM1 and GSTD9 significantly decreased the survival of imidacloprid-exposed  
16 whiteflies.  
17  
18  
19  
20  
21  
22  
23  
24  
25  
26  
27  
28  
29  
30  
31  
32  
33  
34  
35  
36  
37  
38  
39  
40  
41  
42  
43  
44  
45  
46  
47  
48  
49  
50  
51  
52  
53  
54  
55  
56  
57  
58  
59  
60  
61



## Discussion

Species in the *Bemisia* complex have a high reproductive rate, broad plant host range that includes many eudicot plant families, and the ability to adapt to a wide range of local environmental conditions. These traits likely contribute to the ability of *Bemisia* to rapidly develop insecticide resistance and become invasive in novel habitats [1]. The evolutionary history of *Bemisia* has altered its genome via adaptations that can influence the breadth of functions carried out by certain gene families [26]. For instance, cytochrome P450 monooxygenase genes encode enzymes involved in a variety of biosynthetic and metabolic pathways, including xenobiotic detoxification [27,28]. These form a repertoire of defensive pathways employed by herbivorous insects that feed on chemically-defended plants [29]. Increases in the number of gene family members involved in metabolic detoxification is hypothesized to decrease the impact of environmental toxins via an increase in metabolic rates when the duplicates are co-regulated [30]. Evolutionary processes can also diversify duplicated gene families such that temporal and spatial variation occurs with respect to gene expression patterns or its members derive innovated functions [31]. In addition, some expanded gene families in B-type *B. tabaci* genome like cathepsins and phosphatidylethanolamine-binding proteins, were found to be associated with virus acquisition and transmission and/or combined insecticide resistance likely contributing to the global invasiveness and efficient virus vectoring capacity of *B. tabaci* [32].

The analysis of multiple arthropod genomes has identified lineage-specific expansions in the P450 gene family, such as the expansion of the CYP3 and CYP4 clades in the scorpion *Mesobuthus martensii* [33]. An increasing number of P450s in the CYP3 and CYP4 clades also occurs in the genome of *T. castaneum* [34], and here in the MED/Q genome (Fig 2). This may reflect the fact that both CYP3 and CYP4 are involved in detoxification and the evolution of insecticide resistance in arthropods [35-39]. The large number of these detoxification genes in MED/Q likely contributes to its high degree of insecticide resistance, but further comparative works is necessary to rigorously assess correlations between specific gene family member expansions and species-level biological/ecological characteristics. Understanding the genetic and genomic mechanisms that underlay the ability of arthropods to rapidly involve insecticide resistance may help devise practices to circumvent this cycle of recurrent adaptation.

Another fascinating topic for future research involves the degree to which the ability of invasive *Bemisia* to establish and exclude native *Bemisia* has a genomic basis. In China, for instance, the introduction of MED/Q led to the extirpation of the formerly-dominant invasive MEAM1/B from many locales [12,40]. P450 genes in *Bemisia* can be induced under various conditions, including host plant switches, and are upregulated in insecticide-resistant strains [41,29]. The fact that these genes are also constitutively expressed under normal conditions [42], however, suggests they are either primed for rapid response to stress or involved in cellular homeostasis. Although neonicotinoid insecticides are effective against phloem-sucking insects, including whiteflies, aphids, and thrips, high levels of resistance, however, have been recently reported for *B. tabaci* in the field worldwide [43-45]. Previous studies showed that some Cytochrome P450s and GSTs are overexpressed in neonicotinoid-resistant *Bemisia* [41, 46-51]. In this study, nine CYP450s and three GSTs were subjected to dietary RNAi-mediated functional analyses. The silencing of a CYP6 gene, CYP6EM1, significantly increased the susceptibility of *B. tabaci* to insecticide treatments, indicating a potential role in imidacloprid resistance. In other insects, UGT are primarily sugar donors that are closely related to various plant allelochemical- and odorant-degrading enzymes [52-54]. Research has found that UGT in *Bemisia* plays a role in allowing whiteflies to feed on nicotine-defended plants [55], suggesting that UGT-linked detoxification of plant defenses may facilitate polyphagy in *Bemisia*. Conducting genome-level comparisons of detoxification-

1 related gene families allows the testing of hypotheses regarding the capacity of MED/Q to  
2 resist insecticides, feed on multiple host plants, and adapt to the novel stressors present in  
3 new environments.

4 Endosymbiosis between host eukaryotic cells and intracellular microorganisms  
5 involves a series of adaptive changes. The most ancient of these is likely the acquisition of  
6 environmental bacteria and subsequent HGT that led to the current mitochondrion and the  
7 nuclear-encoded mitochondrial components of the ATP biosynthesis pathway. Insects contain  
8 an array of intracellular bacteria and fungi, a proportion of which have formed mutualistic  
9 relationships with their hosts; such partnership appear particularly common in the order  
10 Hemiptera [56,57]. The impact of these symbiotic relationships on the metabolic capacity of  
11 host genomes are just starting to be revealed through whole-genome analyses [58]. All  
12 *Bemisia* species host the primary endosymbiont *Portiera aleyrodidarum* [59] and a variety of  
13 species-specific secondary endosymbionts; these include *Arsenophonus*, *Wolbachia*,  
14 *Hamiltonella*, *Candidatus*, *Cardinium*, *Fritschea* and *Rickettsia* [60-63]. Previous studies  
15 have suggested the potential for metabolic complementarity between *Bemisia* and *Portiera*  
16 and between *Bemisia* and *Hamiltonella* [18,19]. Transcriptome-based analysis of MEAM1/B  
17 that compared both bacteriocytes and whole-body samples reported that the host genome may  
18 contribute enzymes that complement or duplicate *Portiera*-encoded pathways, and that  
19 *Hamiltonella* might contribute multiple cofactors and the essential amino acid Lys [18].  
20 Analysis of the *Portiera* genome found that it lacked genes essential for the biosynthesis of  
21 certain amino acids, a result supported by the findings of transcriptome-based research  
22 [17,64]. Our work provides the first assessment of gene reduction and metabolic pathway  
23 complementarity in the MED/Q-symbiont relationship. We found that *Portiera* allows  
24 MED/Q to survive on phloem sap by facilitating the synthesis of 10 essential amino acids  
25 (Fig 4), and that *Hamiltonella* contributes B-vitamins that its host cannot produce (Fig 5B).

26 The presence of numerous metabolic pathways that require both the host and its  
27 endosymbionts suggests that theirs is an obligate symbiosis. While such complementarity  
28 could evolve through gene loss in either the host or endosymbiont via relaxation of selective  
29 constraints when multiple copies of a given gene are present, it can also occur through HGT.  
30 For instance, enzymes involved in carotenoid biosynthesis were derived from fungal genes  
31 integrated into the *A. pisum* genome [65]. Horizontally-transferred genes in the citrus  
32 mealybug *Planococcus citri* also contribute to functions absent in its endosymbionts, which  
33 evolved a different system of amino acid synthesis [66]. The fact that 11 enzymes require the  
34 biosynthetic pathways of both MED/Q and *Portiera* suggests that inter-genome pathway  
35 complementarity may be an initial step in such obligatory endosymbiotic relationships.

36 The insect immune system modifications necessary to facilitate the residency of  
37 previously extracellular bacteria that otherwise might be seen as pathogenic agents are also of  
38 interest. Acceptance of a foreign bacteria by the host, or evasion of host defenses by the  
39 bacteria, is essential for any intracellular symbiosis. In *D. melanogaster*, for instance,  
40 infection by Gram-negative bacteria activates the IMD pathway [67]. Since the obligate  
41 endosymbionts of both *Bemisia* and *A. pisum* are Gram-negative bacteria [67,68], the loss of  
42 IMD pathway components in both species may be more than a coincidence: loss of IMD  
43 function may have facilitated the acquisition of endosymbiotic bacteria [69]. We estimate the  
44 divergence of *Bemisia*, *A. pisum* and *N. lugens* occurred 286 million years ago (MYA) (Fig 1;  
45 Fig S4), an estimate consistent with other research dating the divergence of the  
46 Auchenorrhyncha (containing *N. lugens*) and Sternorrhyncha (containing *A. pisum* and  
47 *Bemisia*) to 290 MYA [70]. These evolutionary events and recent studies suggest that the  
48 ancestors of *Bemisia* and *A. pisum* acquired their obligate endosymbionts after separating  
49 from the group containing *N. lugens*, a split that may have involved a loss-of-function event  
50 in the IMD system of the former group. The absence of a functioning IMD pathway in  
51  
52  
53  
54  
55  
56  
57  
58  
59  
60

1 MED/Q may also have contributed to subsequent acquisition of *Hamiltonella* and other  
2 facultative endosymbionts that have been detected in members of the *Bemisia* complex.  
3

#### 4 **Conclusions**

5  
6 Our report of the *Bemisia* MED/Q genome is a first for this economically-important invasive  
7 species. The insight it provides into metabolic gene expansion, nutrient/nutritional  
8 partitioning, and immune system reduction shed new light on the genetic and molecular basis  
9 of adaptations likely critical to the success invasion of *Bemisia*. Twelve detoxification genes  
10 (e.g., CYP6EM1) derived from MED/Q genome were investigated by both conventional PCR  
11 analysis and RNAi-mediated functional validation to assess their potential involvement in  
12 imidacloprid resistance. The correlation between the expanded cytochrome P450 gene family,  
13 a group well-known for their role in detoxification, and the high degree of insecticide  
14 resistance in MED/Q is unlikely to be coincidental. More importantly, this MED/Q genomic  
15 resource provides a foundation for future 'pan-genomic' comparisons of invasive vs. non-  
16 invasive, invasive vs invasive, and native vs. exotic *Bemisia* that opens new avenues of  
17 investigation into whitefly biology, evolution, and management.  
18  
19  
20  
21  
22  
23

#### 24 **Potential implications**

25  
26 Several members of the *Bemisia tabaci* complex are invasive species that cause considerable  
27 economic damage to agricultural and horticultural crops via their feeding and their role as  
28 plant pathogen vectors. Sequencing the genome of the Mediterranean Q *Bemisia* revealed  
29 molecular signatures of adaptation that may contribute to the highly invasive nature of this  
30 pest. An array of numerical and compositional changes in multiple gene families provides a  
31 foundation for future hypothesis testing that will further our understanding of adaptation,  
32 viral transmission, symbiosis, and plant-insect-pathogen tritrophic interactions.  
33  
34  
35  
36  
37  
38  
39  
40  
41  
42  
43  
44  
45  
46  
47  
48  
49  
50  
51  
52  
53  
54  
55  
56  
57  
58  
59  
60  
61

## Methods

### Illumina library construction

The Q-type *Bemisia tabaci* was first reported in China when it was identified on *B. tabaci*-infested poinsettia plants imported into the Yunnan Province during 2003 [71]. Within only several years, the Q-type (MED) *B. tabaci* had invaded most of the southeastern and northeastern provinces in China, where it rapidly displaced the exotic B-type (MEAM1), previously established there [40]. Adult whitefly females (2n) and males (1n) were initially collected from infested field-grown cucumber plants in Beijing, China during 2011, and used to establish a laboratory colony (MED/Q) at the Institute of Vegetable and Flowers, Chinese Academy of Agriculture Science by transferring adult males and females to caged pepper plants (10-12 leaf stage).

The MED/Q whitefly colony was used as the source initial short shotgun Illumina sequencing. Adult whiteflies fed using Parafilm @membrane sachets containing a 25% sucrose solution for 48 hrs prior to collection of ~5,000 male and female adults (~ 50:50). Samples were immediately frozen in liquid nitrogen for three hours prior to transfer to a -80°C freezer. This genomic DNA was used to construct Illumina TruSeq paired end (PE) sequencing libraries (170, 250, 300, 500 and 800 bp insert sizes) and mate pair (MP) libraries (2, 5, 10, 20 and 40 KB in size) according to manufacturer instructions.

Additionally, two Illumina PE sequencing libraries (~500bp and 800bp inserts) were constructed from whole genome amplification (WGA) reactions carried out on genomic DNA isolated from two adult male whiteflies. First, single males were dissected (body fluid and interior unclassified tissues by removing the outer cuticula) into 1x PBS buffer, and frozen for storage and transport. The PBS buffer containing the cells and tissues was thawed, briefly flicked to mix, and pipetted into PCR tubes in equal amounts. After blending and dissolving adequately, WGA of the DNA from a single male was performed according to the manufacturer's instructions using the REPLI-g Midi Kit (QIAGEN, Inc.), with a "no whitefly tissue" cell reaction as a negative control. Each step during the experiment was performed on a "clean bench" to avoid contamination. To assess the effect of the amplification, the DNA concentration of the WGA products was measured in a Qubit® dsDNA assay (Invitrogen Life Science, Inc.) according to the manufacturer's instructions, and the primary DNA band-size distribution was validated by agarose gel electrophoresis.

### BAC library construction, pooling of clones, and Illumina library construction

High molecular weight (HMW) MED/Q total genomic DNA was isolated as previously described [72], then partially digested with *HindIII*, and size selected from pulsed-field gel electrophoresis (1% agarose gel in 0.5 X TBE gels run on BioRad CHEF-DRIII system) run for 16 hours at 14°C with initial and final time switches of 5 sec and 15 sec, respectively, in a voltage gradient of 6 V/cm. Sizes were compared to the Lambda Ladder PFG Marker (New England Biolabs), and ~100 kb genomic fragments excised. Isolated DNA was ligated into the pCC1BAC vector (Epicentre), transformed into EPI300 *E. coli* cells (Epicentre) by electroporation, and selected on LB agar with chloramphenicol, X-gal and Isopropyl-beta-D-thiogalactopyranoside (IPTG) as described by the manufacturer. A Genetix QPIX was used to pick and array clones into 192 384-well plates containing LB freezing media, and then frozen at -80°C. To BAC vector estimate insert sizes, 10 µl aliquots of BAC miniprep DNA were digested with 5 U of *NotI* enzyme for 2 hours at 37°C, and then separated by pulsed-field gel electrophoresis as described above. All clones from 384-well plates were pooled into 13 libraries (8 or 9 384-well plates per pool), and BAC vector DNA was isolated from LB liquid

1 cultures using Qiagen Large Construct Kits. Purified BAC DNA was used to construct  
2 indexed Illumina TruSeq PE libraries with ~500 bp insert size according to manufacturer  
3 instructions.

#### 4 **Genome sequencing and assembly**

5  
6 All libraries were sequenced on an Illumina HiSeq 2000 using 100 bp reads from both  
7 fragment ends, and raw data processed and assembled as shown (S1 Table; S1 Fig). Briefly, a  
8 series of filtering steps were performed on the raw reads to filter out the following: (1) reads  
9 with >10% Ns, more than 40% low-quality bases, more than 10 bp overlapping with adapter  
10 sequences, allowing no more than 3bp mismatches; (2) paired-end reads that overlapped  
11 more than 10 bp between two ends, with insert size larger than 200 bp libraries; and (3)  
12 duplicated reads generated by PCR amplification during the construction of the large-insert  
13 library. Filtered reads were used for K-mer determination within subsequent assembly steps.  
14 The frequency of each K-mer was calculated from the genome-sequence reads. K-mer  
15 frequencies along the sequence depth gradient follow a Poisson distribution in a given data  
16 set except for a high proportion at low frequency due to sequencing errors, as K-mers that  
17 contain such sequencing errors may be orphans among all splitting K-mers. The genome size,  
18  $G$ , was estimated as  $G = K\_num / K\_depth$ , where  $K\_num$  is the total number of K-mers, and  
19  $K\_depth$  is the maximal frequency. Initial contigs were assembled from filtered 500 and 800  
20 bp insert-size WGA PE libraries using SOAPdenovo. The sequencing reads obtained for 2k-  
21 40kb MP libraries were used to connect the contigs and to generate the scaffolds as described  
22 by Li et al. (2010) [73] with a K-mer size of 65.

23  
24 Individual BAC pools were assembled independently using SOAPdenovo and the  
25 whole genome shotgun reads from PE and MP libraries were used to fill gaps in the BAC  
26 scaffolds. After sequencing, the raw reads were filtered as described above. In addition, reads  
27 representing contamination by *E. coli* or the plasmid vector were filtered. The pooled reads  
28 were separated according to the BAC-reads index, and each BAC was assembled using a  
29 combination of “hierarchical assembly” and “*de Bruijn* graph assembly”. First, the reads  
30 linked to each BAC were assembled using SOAPdenovo [73], with various combinations of  
31 parameters with a K-mer range from 27 to 63 and a step size of 6. The assembly with the  
32 longest scaffold N50 was defined as the “best” for each BAC. The resulting BACs were  
33 mapped with the large shotgun MP read data to optimize the assembly for each BAC.

34  
35 The final draft assembly was produced by integrating sequences that overlapped  
36 among the scaffolds independently assembled from genome shotgun and BAC reads, and in  
37 doing so eliminated the redundant scaffolds using the following steps. In order to integrate  
38 the two assemblies, the software *Rabbit* [74] was applied to identify any relationship between  
39 scaffolds, to connect the overlapping regions that shared at least 90% similarity, and to  
40 remove redundancy based on a 17-mer frequency. Finally, *SSPACE* [75] was used to construct  
41 super-scaffolds containing 800 bp-40 kb WGS reads, and the 170-800 bp genome shotgun  
42 read data were used to fill the gaps using *GapCloser* [73].

43  
44 Post-assembly processing included removal of contaminating bacterial and viral DNA  
45 sequences, by aligning all assembled sequences to the genome sequences of viruses and  
46 bacteria, obtained from previous local BLASTn alignments and by NCBI upload filter.  
47 Aligned sequences that shared >90% identity and were >200 bp in size were filtered from the  
48 final assembly. The assembled sequences that were covered by at least one EST sequence  
49 were retained. Process read data was mapped the the draft MED/Q genome using  
50 *SOAPaligner* software and read counts were made from .bam files and the average depth was  
51 computed from all bases in the window. The relation graph of base pair percentages, and each  
52 given sequencing depth along the genome, was obtained.



## Annotation of repetitive elements

Repetitive elements were searched for and identified using *Repbase* [24] implemented in *TRF* software [76], and a *de novo* approach implemented in *Piler* [77]. For the *Repbase*-based method, two software programs named *RepeatMasker* [25] and *RepeatProteinMask* were used to identify repetitive sequences. In the *de novo* approach, *Piler-DF-1.0* [77], *RepeatScout-1.0.5* [78], and *LTR-FINDER-1.0.5* [79] were used to build *de novo* repeat libraries from the genome sequences. Finally, the repeated sequences were searched for and classified using the *RepeatMasker* software.

## Gene coverage and annotation of coding regions

Initial evaluation of gene coverage rate in the draft MED/Q1-China genome assembly was assessed by comparing against 248 core eukaryotic genes were obtained using *CEGMA 2.4* [80]. Additionally, 105,067 *B. tabaci* transcript sequences, expressed sequence tags (ESTs), of > 200 bp were used as BLASTn queries against the assembled genome in order to estimate the representation (cutoff *E*-value  $\geq 10^{-40}$ ). Protein-coding gene *de novo* predictions using *GENEWISE* [81] and *ab initio* gene predictions using *GENSCAN* [82] and *AUGUSTUS* [83] were made in combination with 13.7 Gbp of transcriptome (RNA-Seq) data including published Q-type *B. tabaci* body, guts, and salivary glands [84–86] and additional unpublished females and males data (FTP: [http://111.203.21.119/download/\\*.fastq](http://111.203.21.119/download/*.fastq)), to obtain consensus gene sets using *GLEAN* [87].

For homolog-based prediction, protein sequences from nine species (*A. pisum*, *A. mellifera*, *D. melanogaster*, *R. prolixus*, *Z. nevadensis*, *A. gambiae*, *B. mori*, *P. humanus* and *T. castaneum*) were aligned with the MED/Q genome scaffolds using *TblastN* (*E*-value < 1e-5). Target sequences were used to search for accurate gene structures implementing the *GeneWise* software [81]. For the RNA-Seq datasets, the transcriptome reads were first aligned against the genome using *TopHat* [87] to identify candidate exon regions. Then, the *Cufflinks* software [88] was used to assemble the aligned reads into transcripts, and the open reading frames (ORFs) were predicted to obtain reliable transcripts using a Hidden Markov Model (HMM)-based training parameter. Finally, *GLEAN* [87] was used to integrate the predicted genes with the *de novo*, homologous, and RNAseq data to produce the final gene set. The functional annotation of genes was performed using *BLASTP* alignment to KEGG [89], SwissProt and TrEMBL [90] databases. Motifs and domains were determined by *InterProScan* [91] and protein database searches against ProDom, PRINTS, Pfam, SMART, PANTHER and PROSITE.

## Prediction of gene orthology and gene family expansions

Twelve insect species including *Bemisia tabaci* (Genn.) (Gennadius, 1889) (Hemiptera: Aleyrodidae), *Acyrtosiphon pisum* (Harris, 1776) (Hemiptera: Aphididae), *Rhodnius prolixus* (Stal, 1859) (Hemiptera: Triatominae), *Nilaparvata lugens* (Stål, 1854) (Hemiptera: Delphacidae), *Pediculus humanus* (Linnaeus, 1758) (Phthiraptera: Pediculidae), *Apis mellifera* (Linnaeus, 1758) (Hymenoptera, Apidae), *Nasonia vitripennis* (Ashmead, 1904) (Hymenoptera, Pteromalidae), *Tribolium castaneum* (Herbst, 1797) (Coleoptera, Tenebrionidae), *Anopheles gambiae* (Giles, 1902) (Diptera, Culicidae), *Drosophila melanogaster* (Meigen, 1830) (Diptera, Drosophilidae), *Bombyx mori* (Linnaeus, 1758) (Lepidoptera, Bombycidae) and *Danaus plexippus* (Kluk, 1802) (Lepidoptera, Nymphalidae) and two divergent arthropods, *Daphnia pulex* (Müller, 1785) (O. Cladocera, Daphniidae) and *Tetranychus urticae* (C. L. Koch, 1836) (O. Arachnida, Tetranychidae), were used to predict orthologs and to reconstruct the phylogenetic tree. Gene families were identified using *TreeFam* [92,93], and single-copy gene families were assembled to reconstruct phylogenetic



relationships. i) Coding sequences of each single-copy family were concatenated to form one super gene group for each species. ii) All of the nucleotides at codon position 2 of these concatenated genes were extracted to construct the phylogenetic tree by *PhyML* [94], with a gamma distribution across sites and an HKY85 substitution model. iii) The same set of sequences at codon position 2 was used to estimate divergence times among lineages. iv) The fossil calibrations were set with two previous node data [95,96]. v) The *PAML* mcmctree program (v.4.5) [97,98] was used to compute split times using the approximate likelihood calculation algorithm. The software *Tracer* (v.1.5.0) (<http://beast.bio.ed.ac.uk/software/tracer/>) was utilized to examine the extent of convergence for two independent runs.

Gene family expansion and contraction analysis were performed using the software *CAFE 2.1* (<http://sites.bio.indiana.edu/Bhahnlab/Software.html>). In *CAFE* [99], a random birth and death model was used to predict gene gain and loss among gene families across the species-specific phylogenetic tree. Fisher's exact test (Pr0.01) was used to test for over-represented functional categories among the expanded genes and "genomic background" genes.

To detect orthologs evolving under positive selection in *B. tabaci*, an optimized branch-site model [100] was used to search the 1,299 single-copy ortholog genes of the four available species of Hemiptera (*B. tabaci*, *A. pisum*, *N. lugens* and *R. prolixus*). Briefly, these ortholog genes were first aligned using the molecular evolution tool *PRANK* [101], and then ambiguously aligned blocks revealed by *PRANK* alignments and filtered by *Gblocks* [102].

Detoxification enzymes within the putatively expanded cytochrome P450 monooxygenase gene family were identified using a homology-based strategy that used reference genes in *D. melanogaster*, *A. pisum*, *A. gambiae*, and *A. mellifera* gene models downloaded from (NCBI, <http://www.ncbi.nlm.nih.gov/>). First, we identified the detoxifying enzyme genes in MED/Q gene models by querying our gene set and scaffolds data with orthologous sequencing using the BLASTx algorithm ( $E\text{-value} \leq 10^{-5}$ ). The segments with hits were linked by the Solar software, and parsed using Genewise software for gene predictions to enable the identification of full-length sequences. The resultant sequences were filtered in searches against the non-redundant (nr) and Interpro databases. After filtering false-positive mating sequences, the genes were manually corrected using the MED/Q transcriptome (mainly to P450 and UGT manual annotation), and phylogenetic trees were constructed using MEGA6.0 [103]. A similar method was applied to identify homologous genes in other selected insects.

The immunity related genes in MED/Q were identified by combining the results from motif-based and homology-based strategies, as previously described [104]. This comparison was accomplished by downloading the query sequences available in ImmunoDB [105], and from the NCBI database for the six insects *D. melanogaster*, *A. gambiae*, *A. aegypti*, *A. mellifera*, *C. quinquefasciatus* and *A. pisum*. The motif-based search, MAFFT [106] was used to align multiple protein sequences, and the software HMMER 3.0 was used to build models against which MED/Q sequences were searched using tblastn with hits linked using the Solar software. Genewise software [81] was used to improve the gene predictions and to obtain full-length gene sequences. The resultant sequences were manually edited and merged into a combined dataset of immune-related genes. The immune-related genes of *A. pisum* and *N. lugens* were used for comparisons with whitefly genes obtained using a similar approach.

### Metagenomics and analysis of MED/Q endosymbiosis

To improve the *B. tabaci* MED/Q-associated *Hamiltonella* draft genome (AJLH00000000), sequencing data from 16 Illumina read paired-end libraries, ranging from 170 bp to 40 kb (44 lanes), from the MED/Q genome-sequencing project were used. Four sequences were

1 selected as references to filter candidate reads using SOAPaligner (Version: 2.21). These  
2 sequences included a previous draft of the *Hamiltonella* genome (372 scaffolds;  
3 AJLH00000000), the pea aphid *Hamiltonella* genome (CP001277), the *Yersinia pestis* CO92  
4 complete genome (AL590842), and the *Serratia plymuthica* AS9 genome (CP002773). The  
5 SOAPaligner parameters were "-v 5" for the short insert size library (<1 kb) data and "-v 3 -  
6 R" for the large insert size library (>1 kb) data. SOAPdenovo (version 2.04) was used for  
7 genome assembly, using the parameters "-u -d 1 -F -K 45" on the above 170 bp to 40 kilo bp  
8 data. Gap filling was performed after scaffold construction, and a super-scaffold was also  
9 then obtained using the paired-end reads on >500 bp scaffolds to reduce the scaffold number.  
10 Then, the Unique Genome Profile (UGP) pipeline was applied to link the scaffolds using  
11 BAC sequences from MED/Q. Briefly, 1) the flanking 20 KB sequences of each scaffold  
12 were removed, and then unique tags (31-mer) were constructed; 2) the BAC sequences (<150  
13 kb) were BLAST against unique tags; and 3) BACs that had more than two hits were filtered,  
14 and then used to construct link relationships to connect larger scaffolds. In addition, the  
15 genome of the MED/Q-associated primary endosymbiont *Portiera* was filtered and  
16 assembled (as described above) together with four previously reported *Portiera* genome  
17 reference sequences obtained from B-type and Q-type *B. tabaci* (GenBank: CP003708,  
18 CP003868, CP003867 and CP003835).

19 Genes were predicted for the finished *Hamiltonella* and *Portiera* genomes using  
20 Glimmer v3.02 (protein-coding genes), tRNAscan-SE (tRNAs) and RNAmmer v1.2 (rRNA).  
21 The putative coding sequences were annotated using BlastP similarity searches that showed  
22 consensus to the NR database (20121005). The E-value cutoff of 1e-5 and a minimum match  
23 percentage of 40% were selected for the analysis. Protein domain searches were conducted  
24 using InterProScan v4.8, available at the Pfam database, and the resulting coding sequences  
25 were used to search the KEGG database (<http://www.genome.jp/tools/kaas/>).  
26 The amino acid synthesis-related genes in the MED/Q genome were searched against the NR  
27 database, under the scenario that they were not of insect origin. The genes identified in this  
28 way were used to construct a phylogenetic tree. To confirm that the HTGs identified were not  
29 contaminants associated with rogue bacterial sequences in the libraries, satisfying at least one  
30 of the two following conditions was necessary: 1) the HTGs were located on scaffolds that  
31 included coding regions homologous to other insects; and 2) the HTGs' transcripts should be  
32 present in alignments to a current transcriptome database (after manual corrections) and also  
33 as corresponding genes encoded by the genome.

## 41 Quantitative real-time PCR

42 Total RNAs were extracted from 30-40 *B. tabaci* adults (mixed sexes, female: male=1: 1) per  
43 strain using a Trizol reagent (Tiangen Corp., Beijing, China) following the manufacturer's  
44 protocol. The total RNA was resuspended in the nuclease-free water and quantified with a  
45 spectrophotometer (Thermo Scientific Nanodrop 2000). Subsequently, the first-strand cDNAs  
46 were synthesized using the PrimeScript® RT reagent Kit (Takara Biotech, Tokyo, Japan)  
47 with gDNA Eraser according to the manufacturer's protocol. Reverse transcription was  
48 performed on 1.0 µg of each RNA sample. Synthesis of P450 and GST genes dsRNA and  
49 application of RNAi to insect were carried out according to published protocols. In addition,  
50 dsRNAs were prepared using the T7 RiboMAX Express RNAi system and protocols  
51 (Promega).

52 A total 120 adults (three biological replicates, n=40) were subjected to qRT-PCR  
53 analysis. Nine cytochrome CYP450 and three GST genes sequences were obtained from this  
54 MED/Q genomic sequencing project (CYP450 mainly selected from MED/Q-specific  
55 expansions in Fig 2B; GSTs selected randomly from our GSTs annotation). Full length  
56 primers were designed to analysis the quantitative of genomic genes annotation, and qRT-  
57

1 PCR primers were designed to amplify a 85- to 250-bp fragment at annealing temperature of  
2 60 °C (S16 Table). The amplification efficiency of these q-PCR primers are 95-105%. The  
3 20- $\mu$ l reaction mixture consisted of 1  $\mu$ l of 300ng cDNA (3 times diluted), 10  $\mu$ l of the  
4 SYBR® Green Real-time PCR Master Mix with ROX (Tiangen Corp., Beijing, China), and  
5 0.6  $\mu$ l of each primer. qPCR was conducted with the ABI 7500 system by the following  
6 protocol: 15 min of activation at 95°C followed by 40 cycles of 10 s at 95°C, 30 s at 60°C,  
7 and 30s at 72°C. A 3-fold dilution series of the whitefly cDNA was constructed the relative  
8 standard curve to calculate the amplification efficiency of the 12 genes. EF- $\alpha$  of *B. tabaci*  
9 were used as reference gene [107]. The RNA interference efficiency in CYP450 and GST  
10 genes expression, normalized to reference gene, were calculated using the  $2^{-\Delta\Delta C_t}$  method  
11 [108].  
12

### 13 ***In vivo* dietary RNA interference**

14 Dietary RNAi was carried out in a feeding chamber consisting of a glass tube (20 mm in  
15 diameter  $\times$  50 mm long, open at both ends), which was covered at the top end by one layer of  
16 Parafilm membrane (Alcan Packaging, Chicago, IL, USA) [47]. A 0.2-mL of diet solution  
17 containing 5% yeast extract and 30% sucrose (wt/vol) was placed on the outer surface of the  
18 Parafilm and was covered with another layer to encase the solution between the Parafilms.  
19 Whiteflies were released into the other end of the tube. Then the tube was sealed with a black  
20 cotton plug and covered with a shade cloth. The end of the tube with a Parafilm membrane  
21 was facing a light source that was approximately 20 cm away. This dietary RNAi system was  
22 used to measure the impact of ingested dsRNAs on the susceptibility to imidacloprid  
23 insecticide in adult *B. tabaci*. Controls included no-insecticide (-, buffer), vehicle (+, buffer),  
24 and control gene (+, EGFP). Buffer was an aqueous solution of artificial diet containing 5%  
25 yeast extract and 30% sucrose (wt/vol). Treatments used the same artificial diet solution  
26 mixed with dsRNAs of P450s and GSTs (0.5  $\mu$ g/ $\mu$ L) [47]. dsRNAs were synthesized in vitro  
27 using a T7 RiboMAX Express RNAi system following the manufacturer's protocol  
28 (Promega, P1700, USA). In the insecticide toxicity assay, *B. tabaci* adults were fed on both  
29 treatment and control diets containing 0.2 mM imidacloprid. Mortality was assessed after 2  
30 hours of feeding. Newly emerged adults (24h within hatching, mix sexed) were introduced  
31 into the feeding chamber, and placed in an environmental chamber at 25°C, a photoperiod of  
32 L14: D10, and 80% RH. Survival data were analyzed with log-rank test using SPSS (SPSS  
33 for Windows, Rel. 17.0.0 2009. Chicago: SPSS Inc.).  
34  
35  
36  
37  
38  
39  
40  
41  
42  
43  
44  
45  
46  
47  
48  
49  
50  
51  
52  
53  
54  
55  
56  
57  
58  
59  
60  
61

Figures

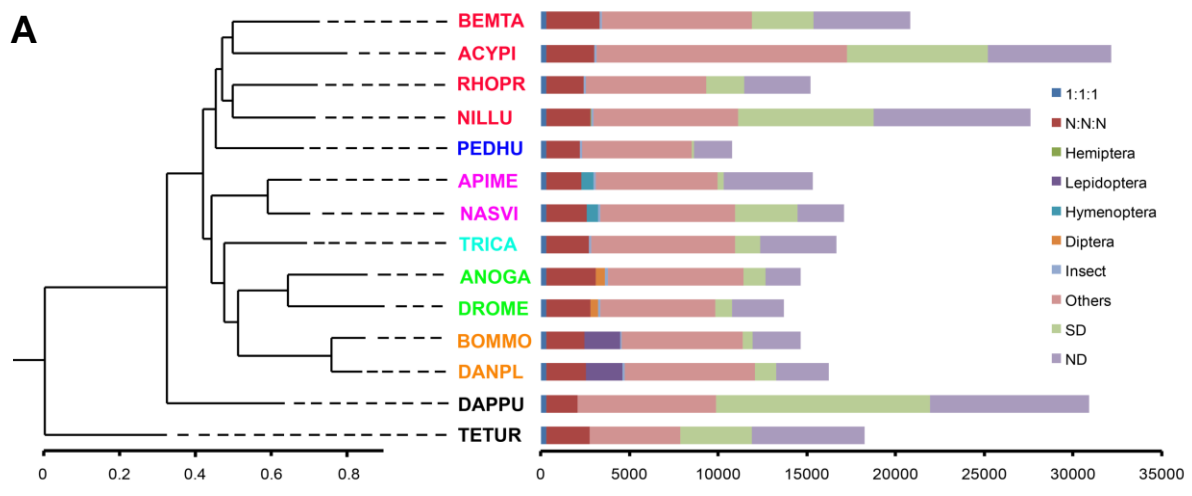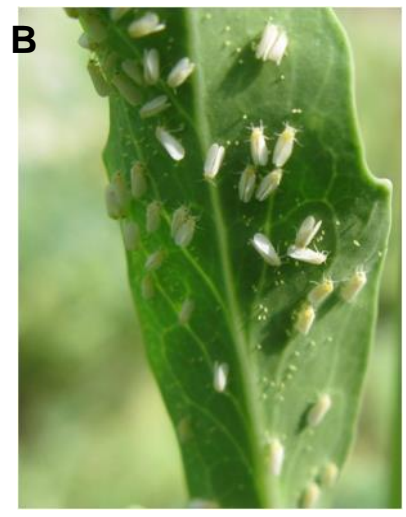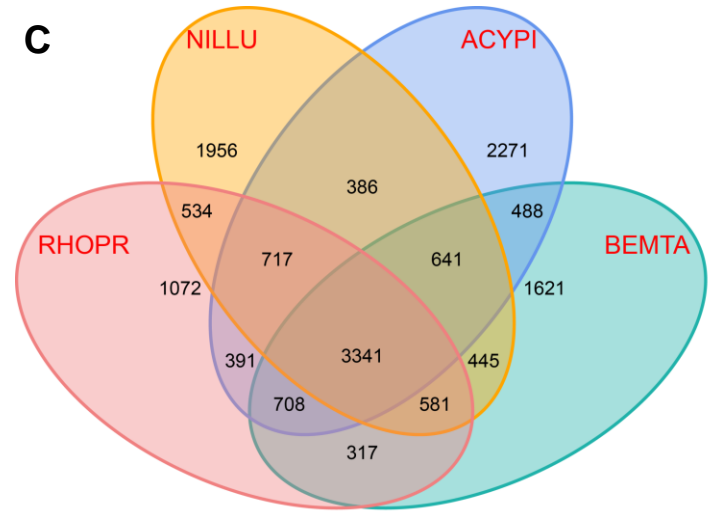

Figure 1

1  
2  
3  
4  
5  
6  
7  
8  
9  
10  
11  
12  
13  
14  
15  
16  
17  
18  
19  
20  
21  
22  
23  
24  
25  
26  
27  
28  
29  
30  
31  
32  
33  
34  
35  
36  
37  
38  
39  
40  
41  
42  
43  
44  
45  
46  
47  
48  
49  
50  
51  
52  
53  
54  
55  
56  
57  
58  
59  
60  
61  
62  
63  
64  
65

| A      | P450 | UGT | GST | ABC | COE | Total |                |
|--------|------|-----|-----|-----|-----|-------|----------------|
| BEMTA* | 153  | 63  | 21  | 59  | 51  | 347   | Phloem feeding |
| ACYPI* | 83   | 58  | 32  | 71  | 37  | 281   |                |
| NILLU* | 65   | 23  | 9   | 57  | 56  | 210   |                |
| RHOPR  | 102  | 15  | 7   | 55  | 49  | 228   | Blood feeding  |
| PEDHU  | 39   | 4   | 12  | 38  | 20  | 113   |                |
| ANOGA  | 115  | 26  | 36  | 59  | 48  | 284   |                |
| DROME  | 85   | 34  | 32  | 53  | 35  | 239   |                |
| APIME  | 54   | 12  | 11  | 41  | 29  | 147   |                |
| NASVI  | 96   | 23  | 19  | 51  | 46  | 235   |                |
| TRICA* | 126  | 28  | 30  | 13  | 51  | 248   |                |
| BOMMO* | 72   | 33  | 27  | 55  | 89  | 276   |                |

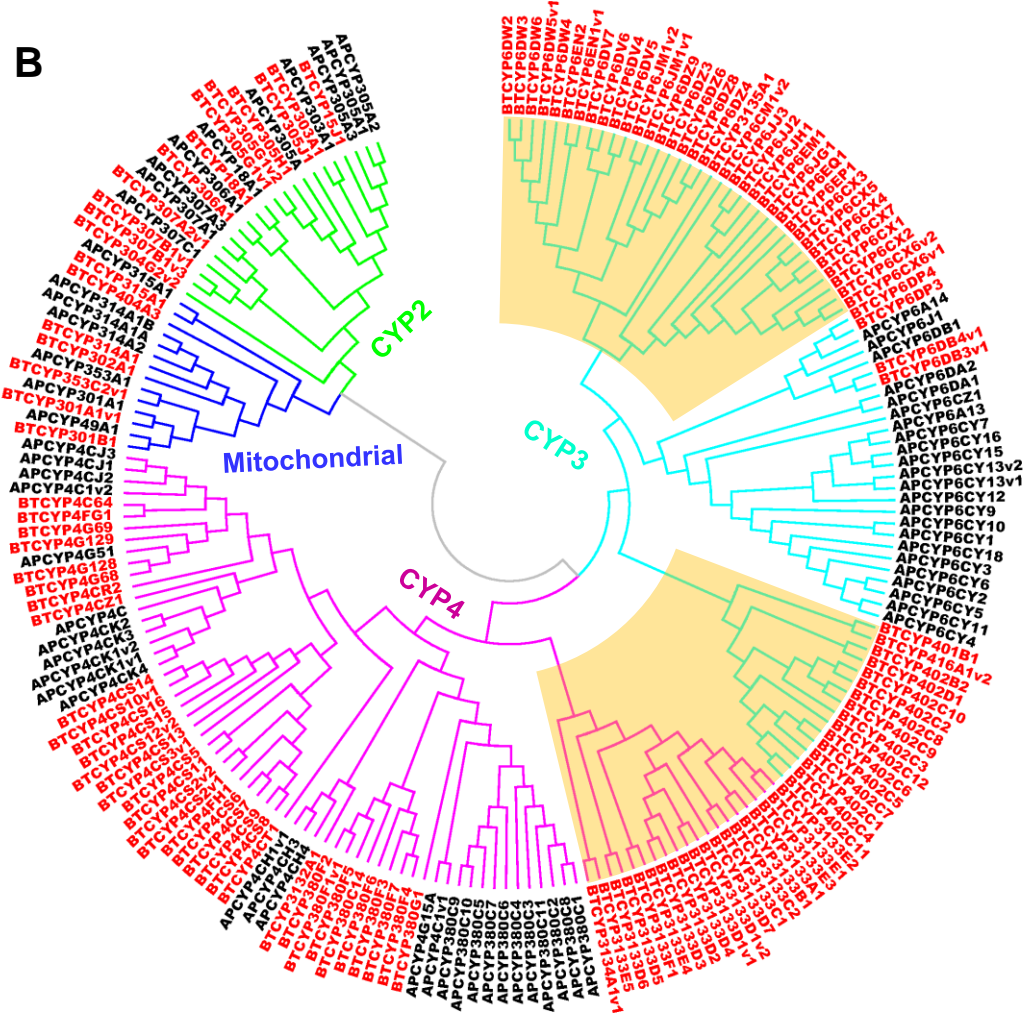

Figure 2



1  
2  
3  
4  
5  
6  
7  
8  
9  
10  
11  
12  
13  
14  
15  
16  
17  
18  
19  
20  
21  
22  
23  
24  
25  
26  
27  
28  
29  
30  
31  
32  
33  
34  
35  
36  
37  
38  
39  
40  
41  
42  
43  
44  
45  
46  
47  
48  
49  
50  
51  
52  
53  
54  
55  
56  
57  
58  
59  
60  
61  
62  
63  
64  
65

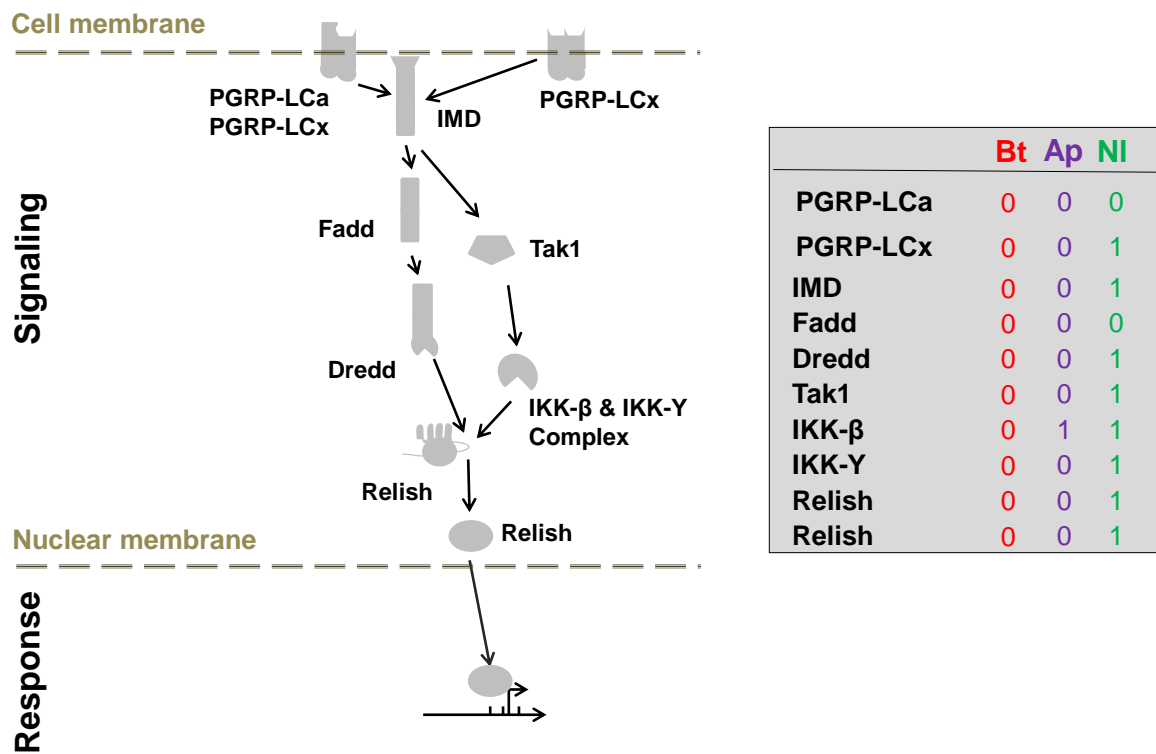

Figure 3



A

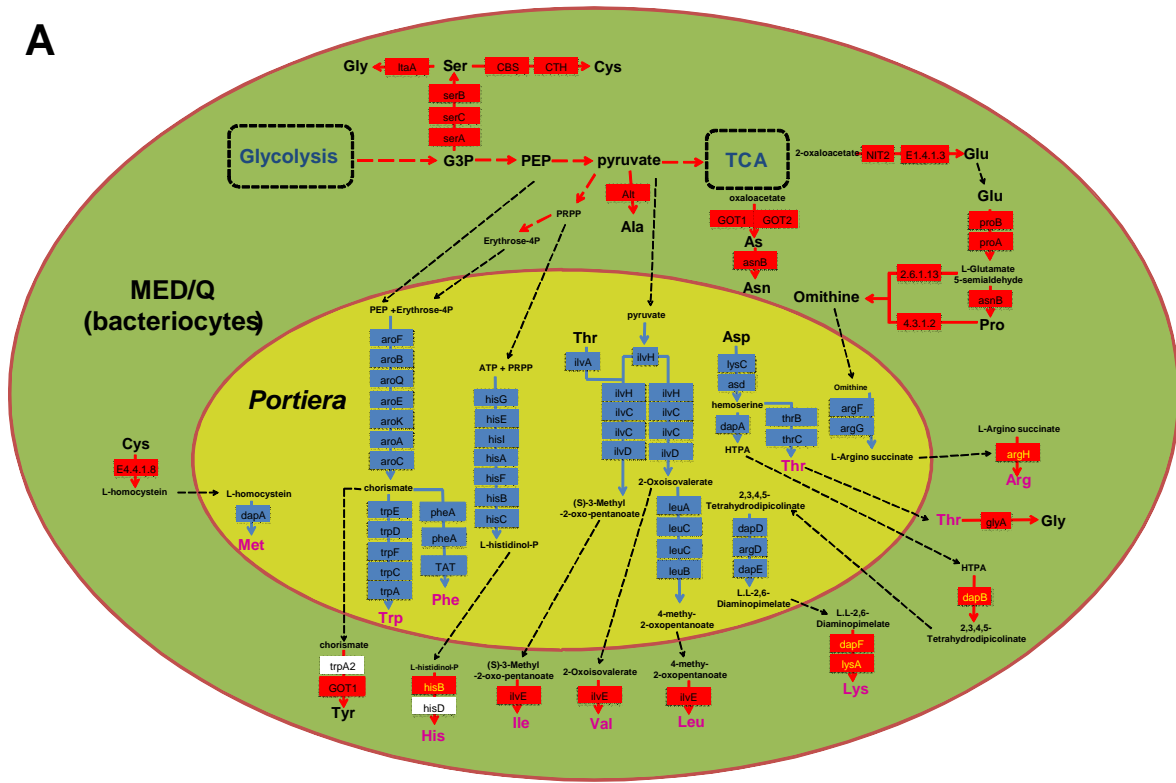

B

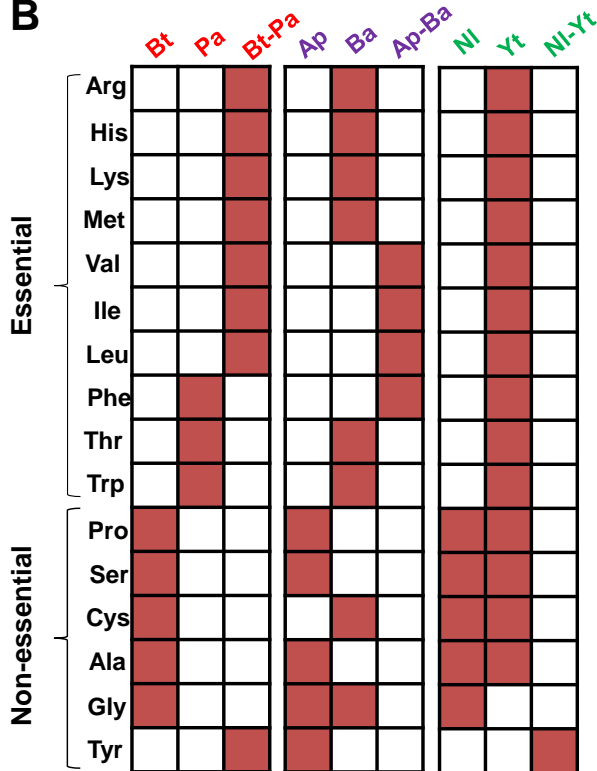

C

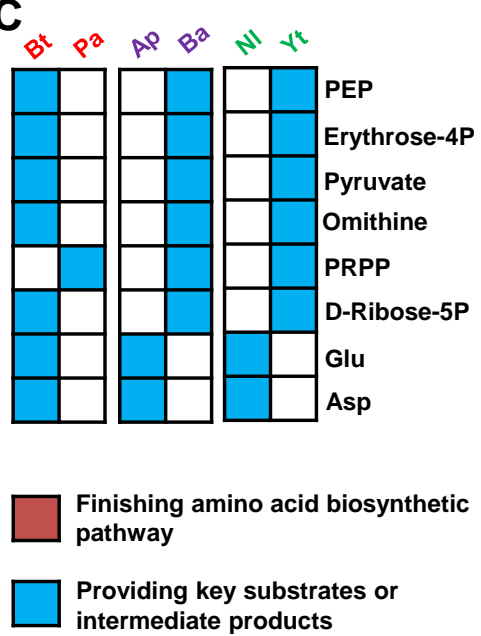

Figure 4

A

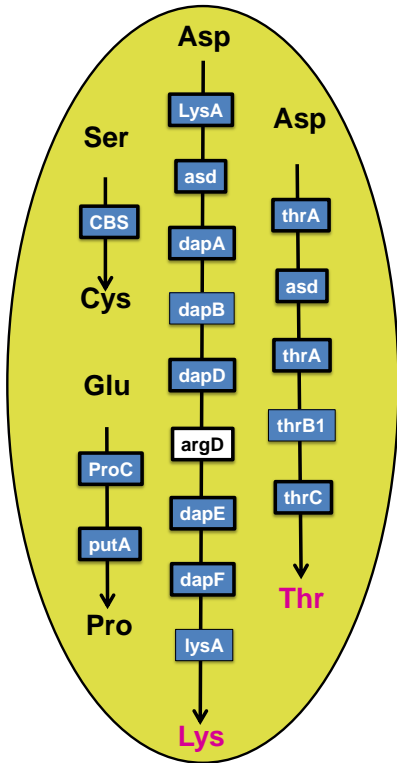

B

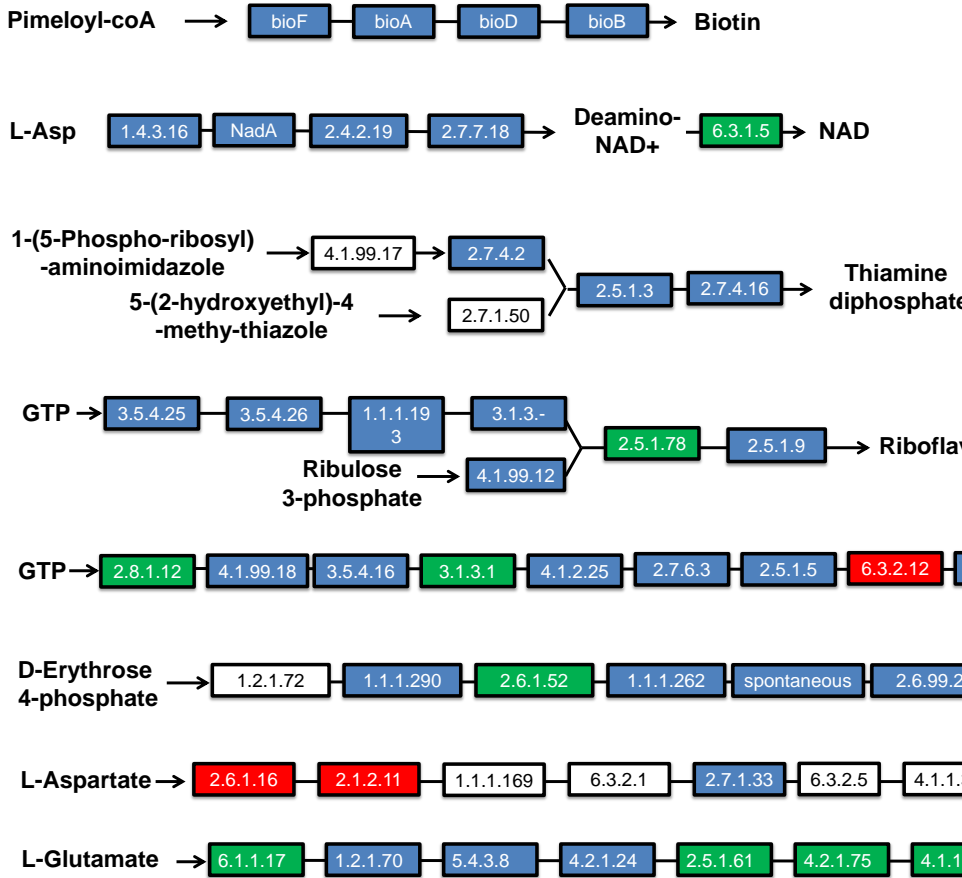

Figure 5

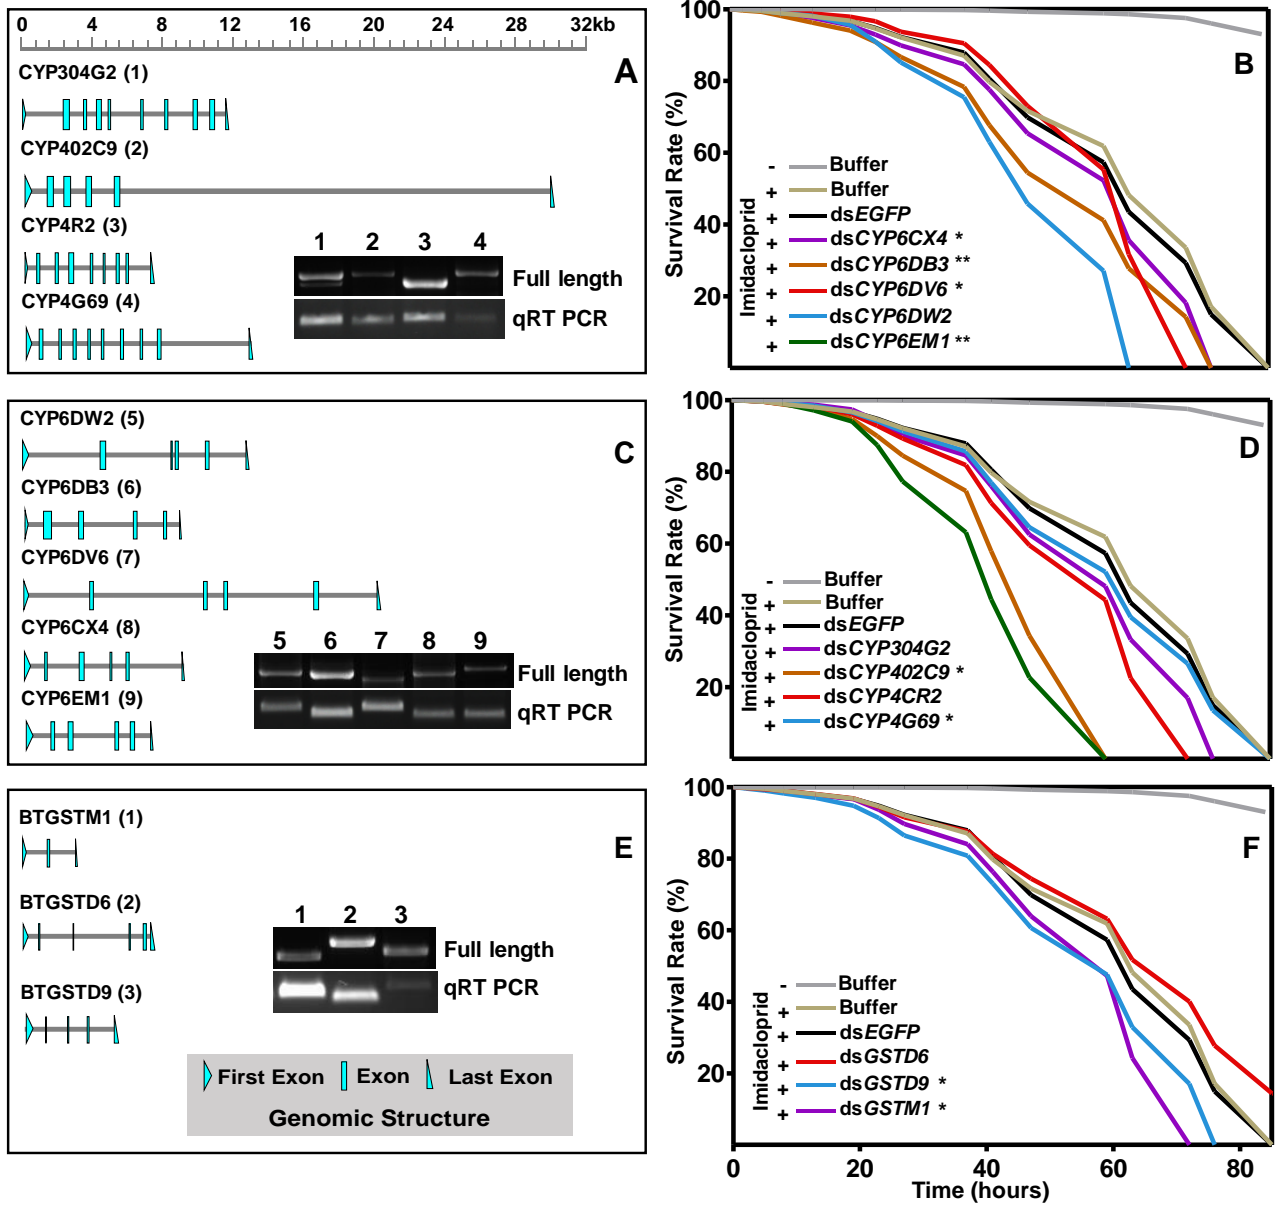

Figure 6

## Tables

**Table 1. Statistics of genome assembly and annotation for MED/Q**

|                                   |                |
|-----------------------------------|----------------|
| Assembled genome size (Mb)        | 658            |
| Number of scaffolds (>100 bp)     | 5,003          |
| Total size of assembled scaffolds | 658,367,382 bp |
| N50 (scaffolds)                   | 436,791 bp     |
| Longest scaffold                  | 2,857,362 bp   |
| Number of contigs (>100 bp)       | 30,873         |
| Total size of assembled contigs   | 638,748,832 bp |
| N50 (contigs)                     | 44,388         |
| Longest contig                    | 362,835 bp     |
| GC content                        | 0.38           |
| Number of GLEAN gene models       | 20,786         |
| Mean transcript length            | 10,043 bp      |
| Mean coding sequence length       | 1,504 bp       |
| Mean number of exons per gene     | 5.12           |
| Mean exon length                  | 294 bp         |
| Mean intron length                | 1,963 bp       |
| Total size of TEs                 | 265,205,801 bp |
| TEs proportion of the genome      | 0.4029         |

## Figure Legend

**Figure 1. Phylogenetic relationships and genomic comparisons between *Bemisia tabaci* and other insect species** (A) Phylogenetic relationships of *B. tabaci* (BEMTA) to insects and other arthropods based on single-copy orthologous genes present in their complete genomes. The following twelve insect species were used for this analysis: *Acyrtosiphon pisum* (ACYPI), *Anopheles gambiae* (ANOGA), *Apis mellifera* (APIME), BEMTA, *Bombyx mori* (BOMMO), *Danaus plexippus* (DANPL), *Drosophila melanogaster* (DROME), *Nasonia vitripennis* (NASVI), *Nilaparvata lugens* (NILLU), *Pediculus humanus* (PEDHU), *Rhodnius prolixus* (RHOPR) and *Tribolium castaneum* (TRICA). The two arthropods *Daphnia pulex* (DAPPU) and *Tetranychus urticae* (TETUR) were used as outgroup taxa. Branch lengths represent divergence times estimated for the second codon position of 308 single-copy genes, using *PhyML* with a gamma distribution across sites and a HKY85 substitution model. The branch supports were inferred based on the approximate likelihood ratio test (aLRT). Gene orthology was determined by comparing the genomes of these 14 arthropod species. The use of 1:1:1 refers to single-copy gene orthologs found across all 14 lineages. The use of N:N:N refers to multi-copy gene paralogs found across the 14 lineages. Diptera, Hemiptera, Hymenoptera, Lepidoptera, and Insecta refer to taxon-specific genes present only in the particular lineage. SD indicates species-specific duplicated genes, and ND indicates species-specific unclustered genes. (B) Image of adult MED/Q. (C) A Venn diagram showing the orthologous groups shared among the hemipteran genomes of *A. pisum*, *B. tabaci*, *N. lugens* and *R. prolixus*. Our analysis found 3,341 gene families common to all four hemipteran genomes, and 2,921 common to the genomes of the six vascular (blood and phloem) feeders.

**Figure 2. Expansion of gene families associated with metabolism and detoxification in**

1  
2  
3  
4  
5  
6  
7  
8  
9  
10  
11  
12  
13  
14  
15  
16  
17  
18  
19  
20  
21  
22  
23  
24  
25  
26  
27  
28  
29  
30  
31  
32  
33  
34  
35  
36  
37  
38  
39  
40  
41  
42  
43  
44  
45  
46  
47  
48  
49  
50  
51  
52  
53  
54  
55  
56  
57  
58  
59  
60  
61  
62  
63  
64  
65

**MED/Q genome.** (A) Number of detoxification-related genes in the genomes of eleven selected insects (\*denotes herbivorous insects) annotated as UDP glycosyltransferases (UGT), glutathione S-transferase (GST), ATP-binding cassette (ABC) transporter, and, carboxyl/choline esterases (COE). (B) Neighbor-joining phylogeny of the cytochrome P450 monooxygenase genes in annotated in the MED/Q genome assembly (red) and orthologs from *A. pisum* (black), with four insect CYP clades indicated as follows: CYP2 (green), CYP3 (blue green), CYP4 (pink), and the mitochondrial clade (blue). Predicted MED/Q-specific expansions within the CYP gene family are indicated (orange boxes).

**Figure 3. Predicted orthologues associated with immune deficiency (IMD) within hemipterans.** Schematic diagram illustrates the IMD signaling and the corresponding responses. The table shows the number of genes encoding each insect genome; this includes *B. tabaci* (Bt), *A. pisum* (Ap), and *N. lugens* (NI).

**Figure 4. Comparative analysis of amino-acid biosynthesis and provisioning mechanisms in *B. tabaci*, *A. pisum* and *N. lugens*.** (A) Unique amino acid biosynthetic and supply mechanisms putatively related to the adaptation of MED/Q. Green and yellow areas denote bacteriocytes and endosymbiont cells (with respect to the filtered and annotated *Portiera* genome of MED/Q, PRJNA299729), respectively. Essential amino acids are represented in pink and non-essential amino acids in black; *Portiera* genes are in blue boxes. The Enzyme Commission numbers (EC) or enzyme names used correspond to those in the Kyoto Encyclopedia of Genes and Genomes (KEGG). MED/Q genes are indicated in red boxes. Black dotted lines represent transport processes between MED/Q and *Portiera*, and red dotted lines represent processes associated with MED/Q that occur within *Portiera* bacteriocytes. Candidate horizontally-transferred genes (HTGs) are highlighted in yellow



1 text; white boxes with black text represent unidentified genes. **(B)** Comparisons of amino  
2 acid biosynthesis in the host-symbiont bacterial systems of *B. tabaci-Portiera*, *A. pisum-*  
3 *Buchnera*, and *N. lugens*-yeast-like organism. Abbreviations: *Bt-Bemisia tabaci*, *Ap-*  
4 *Acyrtosiphon pisum*, *Nl-Nilaparvata lugens*, *Pa-Portiera*, *Ba-Buchnera*, *Yt-yeast-like*. The  
5 notation *Bt* (*Ap*, *Nl*, *Pa*, *Ba*, or *Yt*) means that MED/Q alone can complete the amino acid  
6 biosynthesis. The notation *Bt-Pa* (*Ap-Ba* or *Nl-Yt*) means that both MED/Q and at least two  
7 of its endosymbionts are required to complete the amino acid biosynthetic pathway. **(C)**  
8 Comparison of key substrates or intermediate products of the host-endosymbiont systems of  
9 *B. tabaci-Portiera*, *A. pisum-Buchnera* and *N. lugens*-yeast-like symbiont, illustrating that  
10 phosphoenolpyruvic acid (PEP), erythrose-4P, pyruvate, ornithine, and the precursor of  
11 histidine synthesis (PRPP) are important for amino acid synthesis. Pyruvate and PEP are  
12 produced by glycolysis and erythrose-4P by the pentose phosphate pathway. D-ribose-5P is  
13 the substrate for PRPP synthesis, and D-ribose-5P was converted based on D-glyceraldehyde  
14 3-phosphate, also a product of glycolysis. Black arrows with dotted lines represent transport  
15 processes between MED/Q and *Portiera*.

16  
17  
18  
19  
20  
21  
22  
23  
24  
25  
26  
27  
28  
29  
30  
31  
32  
33  
34  
35  
36  
37  
38  
39 **Figure 5. Pathways encoded by *Candidatus hamiltonella* for amino acid and vitamin**  
40 **biosynthesis. (A)** The major components of amino acid pathway encoded by *Hamiltonella*, a  
41 facultative *Bemisia* endosymbiont (essential amino acids in pink). *Hamiltonella* genes are  
42 highlighted in blue boxes, with names corresponding to its genome (PRJNA299727). **(B)**  
43 Independence and complementarity in the vitamin synthesis pathways of MED/Q (red box)  
44 and *Hamiltonella* (blue box). Green boxes denote candidate genes encoded by both MED/Q  
45 and *Hamiltonella*, while white boxes indicate genes that do not have a match in either  
46 genome.  
47  
48  
49  
50  
51  
52  
53  
54  
55  
56  
57  
58  
59  
60  
61

**Figure 6. Effect of imidacloprid on MED/Q survival following dietary RNAi.** Genomic structures of CYP4 subfamily genes (*CYP304G2*, *CYP402C9*, *CYP4CR2* and *CYP4G69*), CYP6 subfamily genes (*CYP6CX4*, *CYP6DB3*, *CYP6DV6*, *CYP6DW2* and *CYP6EM1*), and GST genes (*GSTD6*, *GSTD9* and *GSTM1*) are shown in **A**, **C**, and **E**, respectively. Full length and qRT-PCR analyses are displayed in the inserted gel pictures. Survival rates of CYP4, CYP6, and GST knockouts when exposed to 0.2mM imidacloprid are documented in **B**, **D**, and **F**, respectively (log-rank test, \*  $p < 0.05$ ; \*\*  $p < 0.01$ ). Controls include no-insecticide (-, buffer), vehicle (+, buffer), and control gene (+, EGFP). Buffer refers to an aqueous artificial diet solution containing 5% yeast extract and 30% sucrose (wt/vol).

## Abbreviations

1  
2  
3 AMP: anti-microbial peptide; ArK: adaptor protein; MED/Q1: Bemisia tabaci Q1; CEGMA:  
4  
5 Core Eukaryotic Genes Mapping Approach; COE: carboxyl/choline esterases; cysLGIC: cys-  
6  
7 loop ligand-gated ion channel; dsx: doublesex; EST: Express sequence tag; GABA:  $\gamma$ -  
8  
9 aminobutyric acid; GluCl<sub>s</sub>: glutamate-gated chloride channels; GST: glutathione S-  
10  
11 transferases; HisCl<sub>s</sub>: histamine-gated chloride channels; HMW: high molecular weight;  
12  
13 HTGs: horizontally transferred genes; IMD: immune deficiency; IMP: insulin-like growth  
14  
15 factor II mRNA-binding protein; IPTG: Isopropyl-beta-D-thiogalactopyranoside; MED:  
16  
17 Mediterranean; mtCOI: mitochondria cytochrome oxidase I; MYA: million years ago;  
18  
19 nAChRs: nicotinic acetylcholine receptors; NA-Med-ME: North Africa-Mediterranean-  
20  
21 Middle East; OUTs: operational taxonomic units; P450: cytochrome P450 mono-oxygenases;  
22  
23 PHCl<sub>s</sub>: pH-sensitive chloride channel; PSI: P-element somatic inhibitor; Sxl: Sex-lethal; TEs:  
24  
25 transposable elements; Tra: transformer; Tra2: transformer 2; TYLCV: tomato yellow leaf  
26  
27 curl virus; UGTs: UDP glycosyltransferases; WGA: whole-genome amplified; WGS: whole  
28  
29 genome shotgun  
30  
31  
32  
33  
34  
35  
36  
37  
38  
39  
40  
41  
42  
43  
44  
45  
46  
47  
48  
49  
50  
51  
52  
53  
54  
55  
56  
57  
58  
59  
60  
61  
62  
63  
64  
65

## Acknowledgments and Funding

The authors would like to thank Dr. Paul De Barro for his comments on an earlier draft. This research was supported by the National Natural Science Foundation of China (31420103919 and 31672032), the Science and Technology Innovation Program of the Chinese Academy of Agricultural Sciences (CAAS-ASTIP-IVFCAAS) and the Beijing Key Laboratory for Pest Control and Sustainable Cultivation of Vegetables. The funders had no role in study design, data collection and analysis, decision to publish, or preparation of the manuscript.

## Authors' contributions

YJZ is the leader of the project and the first corresponding author. WX, YJZ, XGZ, YY, JKB and YL were involved in the project design. XGZ, BYX, JYZ, QG, XCL, XQT, MG, HPP, SXR and BLQ coordinated the related research works of the MED/Q genome project. DW performed genome assembly. DW performed protein-coding gene annotation. MC and CHC performed gene orthology and phylogenomics. XY performed insecticide targets annotation. YTL performed putative sex determination genes annotation. WX performed putative phloem specialization genes identification. LTG, LXT, YNW, YZ, QJW, SLW and HYC performed metabolic detoxification systems annotation. ZZY performed immune signaling pathway components annotation. ZZY, JQX, and JQH performed nutrient partitioning between invasive MED/Q and its primary endosymbiont. LTG performed PCR validation. WX, XGZ, DC, JKB, HD, MNM, FG, XPZ, XWW, FHW, YZD, CL, FMY, ELP and XGJ were involved in writing and editing. All authors read and approved the final manuscript.

## Competing interests

The authors declare no competing interests defined by *Giga Science*.

## References

1. Brown JK, Frohlich DR, Rosell RC. The sweetpotato or silverleaf whiteflies: biotypes of *Bemisia tabaci* or a species complex? *Ann Rev Entomol.* 1995; 40:511-534. doi: 10.1146/annurev.en.40.010195.002455.
2. De Barro PJ, Liu SS, Boykin LM, Dinsdale AB. *Bemisia tabaci*: a statement of species status. *Ann Rev Entomol.* 2011; 56:1-19. doi: 10.1146/annurev-ento-112408-085504.
3. Liu SS, Colvin J, De Barro P. Species concepts as applied to the whitefly *Bemisia tabaci* systematics: how many species are there? *J Inter Agric.* 2012; 11:176-186. doi: 10.1016/S2095-3119(12)60002-1.
4. Wang HL, Yang J, Boykin LM, Zhao QY, Wang YJ, Liu SS, et al. Developing conversed microsatellite markers and their implications in evolutionary analysis of the *Bemisia tabaci* complex. *Sci Rep.* 2014; 4:6351. doi: 10.1038/srep06351.
5. Tay WT, Evans GA, Boykin LM, De Barro PJ. Will the real *Bemisia tabaci* please stand up? *PLoS One.* 2012; 7:e50550. doi: 10.1371/journal.pone.0050550.
6. Boykin LM, Armstrong KF, Kubatko L, De Barro P. Species delimitation and global biosecurity. *Evol Bioinform Online.* 2012; 8:1-37. doi: 10.4137/EBO.S8532.
7. Boykin LM. *Bemisia tabaci* nomenclature: lessons learned. *Pest Manag Sci.* 2014; 70:1454-1459. doi: 10.1002/ps.3709.
8. Mound LA, Halsey SH. Whitefly of the world. A systematic catalogue of the Aleyrodidae (Homoptera) with host plant and natural enemy data. Chichester: British Museum and John Wiley & Sons, 1978; 340pp John Wiley and Sons.
9. Brown JK, Zerbini FM, Navas-Castillo J, Moriones E, Ramos-Sobrinho R, Silva JC, et al. Revision of *Begomovirus* taxonomy based on pairwise sequence comparisons. *Arch Virol.* 2015; 160:1593-1619. doi: 10.1007/s00705-015-2398-y.
10. Jones DR. Plant viruses transmitted by whiteflies. *Eur J Pl Pathol.* 2003; 109:195-219.

doi: 10.1023/A:1022846630513.

- 1  
2  
3 11. Zhang LP, Zhang YJ, Zhang WJ, Wu QJ, Xu BY, Chu D. Analysis of genetic diversity  
4 among different geographical populations and determination of biotypes of *Bemisia*  
5 *tabaci* in China. J Appl Entomol. 2005; 129:121–128. doi: 10.1111/j.1439-  
6  
7 0418.2005.00950.x.  
8  
9
- 10  
11  
12 12. Pan HP, Preisser EL, Chu D, Wang SL, Wu QJ, Carriere Y, et al. Insecticides promote  
13 viral outbreaks by altering herbivore competition. Ecol Appl. 2015; 25:1585-1595.  
14  
15 PMID: 26552266.  
16  
17
- 18  
19 13. Liu BM, Yan FM, Chu D, Pan HP, Jiao XG, Xie W, et al. Multiple forms of vector  
20 manipulation by a plant-infecting virus: *Bemisia tabaci* and tomato yellow leaf curl virus.  
21  
22 J Virol. 2013; 87:4929-37. doi:10.1128/JVI.03571-12.  
23  
24
- 25  
26 14. Iida H, Kitamura T, Honda K. Comparison of egg-hatching rate, survival rate and  
27 development time of the immature stage between B- and Q-biotypes of *Bemisia tabaci*  
28 (Gennadius) (Homoptera: Aleyrodidae) on various agricultural crops. Appl Entomol  
29  
30 Zool. 2009; 44:267-273. doi: <http://doi.org/10.1303/aez.2009.267>.  
31  
32  
33
- 34  
35 15. Pan HP, Chu D, Yan WQ, Su Q, Liu BM, Wang SL, et al. Rapid spread of tomato yellow  
36 leaf curl virus in China is aided differentially by two invasive whiteflies. PLoS One.  
37  
38 2012; 7: e34817. doi:10.1371/journal.pone.0034817.  
39  
40  
41
- 42  
43 16. Liu SS, De Barro PJ, Xu J, Luan JB, Zang LS, Ruan YM, et al. Asymmetric mating  
44 interactions drive widespread invasion and displacement in a whitefly. Science. 2007;  
45  
46 318:1769-1772. doi: 10.1126/science.1149887.  
47  
48  
49
- 50  
51 17. Santos-Garcia D, Farnier PA, Beitia F, Zchori-Fein E, Vavre F, Mouton L, et al.  
52 Complete genome sequence of “*Candidatus Portiera aleyrodidarum*” BT-QVLC, an  
53  
54 obligate symbiont that supplies amino acids and carotenoids to *Bemisia tabaci*. J  
55  
56 Bacteriol. 2012; 194:6654-6655. doi: 10.1128/JB.01793-12  
57  
58  
59  
60  
61

- 1  
2  
3  
4  
5  
6  
7  
8  
9  
10  
11  
12  
13  
14  
15  
16  
17  
18  
19  
20  
21  
22  
23  
24  
25  
26  
27  
28  
29  
30  
31  
32  
33  
34  
35  
36  
37  
38  
39  
40  
41  
42  
43  
44  
45  
46  
47  
48  
49  
50  
51  
52  
53  
54  
55  
56  
57  
58  
59  
60  
61  
62  
63  
64  
65
18. Luan JB, Chen W, Hasegawa DK, Simmons AM, Wintermantel WM, Ling KS, et al. Metabolic coevolution in the bacterial symbiosis of whiteflies and related plant sap-feeding insects. *Genome Biol Evol.* 2015; 7:2635-2647. doi: 10.1093/gbe/evv170.
  19. Rao Q, Rollat-Farnier PA, Zhu DT, Santos-Garcia D, Silva FJ, Moya A, et al. Genome reduction and potential metabolic complementation of the dual endosymbionts in the whitefly *Bemisia tabaci*. *BMC Genomics.* 2015; 16:226. doi: 10.1186/s12864-015-1379-6.
  20. Gottlieb Y, Zchori-Fein E, Mozes-Daube N, Kontsedalov S, Skaljic M, Brumin M, et al. The transmission efficiency of *tomato yellow leaf curl virus* by the whitefly *Bemisia tabaci* is correlated with the presence of a specific symbiotic bacterium species. *J Virol.* 2010; 84:9310-9317. doi: 10.1128/JVI.00423-10.
  21. Chu D, Hu X, Gao C, Zhao H, Nichols RL, Li X. Use of mitochondrial cytochrome oxidase I polymerase chain reaction-restriction fragment length polymorphism for identifying subclades of *Bemisia tabaci* Mediterranean group. *J Econ Entomol.* 2012; 105:242-251. doi: <http://dx.doi.org/10.1603/EC11039>.
  22. Frohlich DR, Torres-Jerez I I, Bedford ID, Markham PG, Brown JK. A phylogeographical analysis of the *Bemisia tabaci* species complex based on mitochondrial DNA markers. *Mol Ecol.* 1999; 8:1683-1691. doi: 10.1046/j.1365-294x.1999.00754.x.
  23. Guo LT, Wang SL, Wu QJ, Zhou XG, Xie W, Zhang YJ. Flow cytometry and K-mer analysis estimates of the genome sizes of *Bemisia tabaci* B and Q (Hemiptera: Aleyrodidae). *Front Physiol.* 2015; 6:144. doi: 10.3389/fphys.2015.00144.
  24. Jurka J, Kapitonov VV, Pavlicek A, Klonowski P, Kohany O, Walichiewicz J. Repbase Update, a database of eukaryotic repetitive elements. *Cytogenet Genome Res.* 2005; 110:462-467. doi:10.1159/000084979.

- 1  
2  
3  
4  
5  
6  
7  
8  
9  
10  
11  
12  
13  
14  
15  
16  
17  
18  
19  
20  
21  
22  
23  
24  
25  
26  
27  
28  
29  
30  
31  
32  
33  
34  
35  
36  
37  
38  
39  
40  
41  
42  
43  
44  
45  
46  
47  
48  
49  
50  
51  
52  
53  
54  
55  
56  
57  
58  
59  
60  
61  
62  
63  
64  
65
25. Smit AFA, Hubley R, Green P. RepeatMasker. 1999; <http://www.repeatmasker.org>.
  26. Lespinet O, Wolf YI, Koonin EV, Aravind L. The role of lineage-specific gene family expansion in the evolution of eukaryotes. *Genome Res.* 2002; 12:1048-1059. doi:10.1101/gr.174302.
  27. Feyereisen R. Evolution of insect P450. *Biochem Soc Trans.* 2006; 34:1252-1255. doi: 10.1042/BST0341252.
  28. Feyereisen R. 8-Insect CYP genes and P450 enzymes. *Insect Mol Biol Biochem.* 2012; 236-316. doi: 10.1016/B978-0-12-384747-8.10008-X.
  29. Xie W, Wang SL, Wu QJ, Feng YT, Pan HP, Jiao XG, et al. Induction effects of host plants on insecticide susceptibility and detoxification enzymes of *Bemisia tabaci* (Hemiptera: Aleyrodidae). *Pest Manag Sci.* 2011; 67:87-93. doi: 10.1002/ps.2037.
  30. Ffrench-Constant, RH. The molecular genetics of insecticide resistance. *Genetics.* 2013; 194:807. doi: 10.1534/genetics.112.141895.
  31. Force A, Lynch M, Pickett FB, Amores A, Yan YL, Postlethwait J. Preservation of duplicate genes by complementary, degenerative mutations. *Genetics.* 1999; 151:1531-1545. PMID: 10101175.
  32. Chen W, Hasegawa DK, Kaur N, Kliot A, Pinheiro PV, Luan JB, et al. The draft genome of whitefly *Bemisia tabaci* MEAM1, a global crop pest, provides novel insights into virus transmission, host adaptation, and insecticide resistance. In Press. 2016. *BMC Biology.*
  33. Cao Z, Yu Y, Wu Y, Hao P, Di Z, He Y, et al. The genome of *Mesobuthus martensii* reveals a unique adaptation model of arthropods. *Nat Commun.* 2013; 4: 2602. doi: 10.1038/ncomms3602.



- 1  
2  
3  
4  
5  
6  
7  
8  
9  
10  
11  
12  
13  
14  
15  
16  
17  
18  
19  
20  
21  
22  
23  
24  
25  
26  
27  
28  
29  
30  
31  
32  
33  
34  
35  
36  
37  
38  
39  
40  
41  
42  
43  
44  
45  
46  
47  
48  
49  
50  
51  
52  
53  
54  
55  
56  
57  
58  
59  
60  
61  
62  
63  
64  
65
34. Zhu F, Moural TW, Shah K, Palli SR. Integrated analysis of cytochrome P450 gene superfamily in the red flour beetle, *Tribolium castaneum*. BMC Genomics. 2013; 14:174. doi: 10.1186/1471-2164-14-174.
  35. Yang Y, Chen S, Wu S, Yue L, Wu Y. Constitutive overexpression of multiple cytochrome P450 genes associated with pyrethroid resistance in *Helicoverpa armigera*. J Econ Entomol. 2006; 99:1784-1789. PMID: 17066813.
  36. Yamamoto K, Ichinose H, Aso Y, Fujii H. Expression analysis of cytochrome P450s in the silkworm, *Bombyx mori*. Pestic Biochem Phys. 2010; 97:1-6. doi:10.1016/j.pestbp.2009.11.006.
  37. Yoon KS, Strycharz JP, Baek JH, Sun W, Kim JH, Kang JS, et al. Brief exposures of human body lice to sublethal amounts of ivermectin over-transcribes detoxification genes involved in tolerance. Insect Mol Biol. 2011; 20:687-699. doi: 10.1111/j.1365-2583.2011.01097.x.
  38. Pridgeon JW, Zhang L, Liu N. Overexpression of CY4G19 associated with a pyrethroid-resistant strain of the German cockroach, *Blattella germanica* (L.). Gene. 2003; 314:157-163. PMID: 14527728.
  39. Scharf ME, Parimi S, Meinke LJ, Chandler LD, Siegfried BD. Expression and induction of three family 4 cytochrome P450 (CYP4) genes identified from insecticide-resistant and susceptible western corn rootworms, *Diabrotica virgifera virgifera*. Insect Mol Biol. 2001; 10:139-146. PMID:11422509.
  40. Pan H, Chu D, Ge D, Wang S, Wu Q, Xie W, et al. Further spread of and domination by *Bemisia tabaci* (Hemiptera: Aleyrodidae) biotype Q on field crops in China. J Econ Entomol. 2011; 104:978-985. doi: <http://dx.doi.org/10.1603/EC11009>.
  41. Karunker I, Benting J, Lueke B, Ponge T, Nauen R, Roditakis E, et al. Over-expression of cytochrome P450 CYP6CM1 is associated with high resistance to imidacloprid in the

- B and Q biotypes of *Bemisia tabaci* (Hemiptera: Aleyrodidae). *Insect Biochem Mol Biol.* 2008; 38:634-644. doi:10.1016/j.ibmb.2008.03.008.
42. Guo L, Xie W, Wang S, Wu Q, Li R, Yang N, et al. Detoxification enzymes of *Bemisia tabaci* B and Q: biochemical characteristics and gene expression profiles. *Pest Manag Sci.* 2014; 70:1588-1594. doi: 10.1002/ps.3751.
43. Nauen R, Denholm I. Resistance of insect pests to neonicotinoid insecticides: current status and future prospects. *Arch Insect Biochem Physiol.* 2005; 58: 200-215. doi: 10.1002/arch.20043.
44. Elbert A, Nauen R. Resistance of *Bemisia tabaci* (Homoptera: Aleyrodidae) to insecticides in southern Spain with special reference to neonicotinoids. *Pest Manag Sci.* 2000; 56: 60-64. doi: 10.1002/(SICI)15264998(200001)56:1<60::AID-PS88>3.0.CO;2.
45. Wang ZY, Yan HF, Yang YH, Wu YD. Biotype and insecticide resistance status of the whitefly *Bemisia tabaci* from China. *Pest Manag Sci.* 2010; 66: 1360-1366. doi: 10.1002/ps.2023.
46. Bass C, Denholm I, Williamson MS, Nauen R. The global status of insect resistance to neonicotinoid insecticides. *Pestic Biochem Physiol.* 2015; 121: 78-87. doi.org/10.1016/j.pestbp.2015.04.004.
47. Yang X, Xie W, Wang SL, Wu QJ, Pan HP, Liu BM, et al. Two cytochrome P450 genes are involved in imidacloprid resistance in field populations of the whitefly, *Bemisia tabaci*, in China. *Pestic Biochem Physiol.* 2013; 107: 343-350. doi.org/10.1016/j.pestbp.2013.10.002.
48. Yang NN, Xie W, Jones CM, Jiao XG, Yang X, Liu BM, et al. Transcriptome profiling of the whitefly *Bemisia tabaci* reveals stage-specific gene expression signatures for thiamethoxam resistance. *Insect Mol Biol.* 2013; 22: 485-496. doi:10.1111/imb.12038View/save citation.

- 1  
2  
3  
4  
5  
6  
7  
8  
9  
10  
11  
12  
13  
14  
15  
16  
17  
18  
19  
20  
21  
22  
23  
24  
25  
26  
27  
28  
29  
30  
31  
32  
33  
34  
35  
36  
37  
38  
39  
40  
41  
42  
43  
44  
45  
46  
47  
48  
49  
50  
51  
52  
53  
54  
55  
56  
57  
58  
59  
60  
61  
62  
63  
64  
65
49. Xie W, Yang X, Wang SL, Wu QJ, Yang NN, Li RM, et al. Gene expression profiling in the thiamethoxam resistant and susceptible B-biotype sweetpotato whitefly, *Bemisia tabaci*. *J. Insect Sci.* 2012; 12: 46-50. doi.org/10.1673/031.012.4601.
  50. Yang X, He C, Xie W, Liu Y, Xia J, Yang, ZZ et al. Glutathione S-transferases are involved in thiamethoxam resistance in the field whitefly *Bemisia tabaci* Q (Hemiptera: Aleyrodidae). *Pestic Biochem Phys.* 2016; doi: 10.1016/j.pestbp.2016.04.003.
  51. Ilias A, Lagnel J, Kapantaidaki DE, Roditakis E, Tsigenopoulos CS, Vontas, J, et al. Transcription analysis of neonicotinoid resistance in Mediterranean (MED) populations of *B. tabaci* reveal novel cytochrome P450s, but no nAChR mutations associated with the phenotype. *BMC Genomics.* 2015; 16: 939. doi: 10.1186/s12864-015-2161-5.
  52. Bozzolan F, Siaussat D, Maria A, Durand N, Pottier MA, Chertemps T, et al. Antennal uridine diphosphate (UDP)-glycosyltransferases in a pest insect: diversity and putative function in odorant and xenobiotics clearance. *Insect Mol Biol.* 2014; 23:539-549. doi: 10.1111/imb.12100.
  53. Luque T, O'Reilly DR. Functional and phylogenetic analyses of a putative *Drosophila melanogaster* UDP-glycosyltransferase gene. *Insect Biochem Mol Biol.* 2002; 32:1597-1604. doi:10.1016/S0965-1748(02)00080-2.
  54. Sasai H, Ishida M, Murakami K, Tadokoro N, Ishihara A, Nishida R, et al. Species-specific glucosylation of DIMBOA in larvae of the rice armyworm. *Biosci Biotech Bioch.* 2009; 73:1333-1338. doi: 10.1271/bbb.80903.
  55. Klot A, Kontsedalov S, Ramsey JS, Jander G, Ghanim M. Adaptation to nicotine in the facultative tobacco - feeding hemipteran *Bemisia tabaci*. *Pest Manag Sci.* 2014; 70:1595-1603. doi: 10.1002/ps.3739.
  56. Urban JM, Cryan JR. Two ancient bacterial endosymbionts have coevolved with the planthoppers (Insecta: Hemiptera: Fulgoroidea). *BMC Evol Biol.* 2012; 12:87. doi:

10.1186/1471-2148-12-87.

- 1  
2  
3  
4  
5  
6  
7  
8  
9  
10  
11  
12  
13  
14  
15  
16  
17  
18  
19  
20  
21  
22  
23  
24  
25  
26  
27  
28  
29  
30  
31  
32  
33  
34  
35  
36  
37  
38  
39  
40  
41  
42  
43  
44  
45  
46  
47  
48  
49  
50  
51  
52  
53  
54  
55  
56  
57  
58  
59  
60  
61  
62  
63  
64  
65
57. Kuechler SM, Gibbs G, Burckhardt D, Dettner K, Hartung V. Diversity of bacterial endosymbionts and bacteria–host co-evolution in Gondwanan relict moss bugs (Hemiptera: Coleorrhyncha: Peloridiidae). *Environ Microbiol.* 2013; 15:2031-2042. doi: 10.1111/1462-2920.12101.
58. Wilson AC, Duncan RP. Signatures of host/symbiont genome coevolution in insect nutritional endosymbioses. *Proc Natl Acad Sci U S A.* 2015; 112:10255-10261. doi: 10.1073/pnas.1423305112.
59. Thao ML, Baumann P. Evolutionary relationships of primary prokaryotic endosymbionts of whiteflies and their hosts. *Appl Environ Microbiol.* 2004; 70:3401-3406. PMID: 15184137.
60. Zchori-Fein E, Brown JK. Diversity of prokaryotes associated with *Bemisia tabaci* (Gennadius) (Hemiptera: Aleyrodidae). *Ann Entomol Soc Am.* 2002; 95:711-718. doi: [http://dx.doi.org/10.1603/0013-8746\(2002\)095\[0711:DOPAWB\]2.0.CO;2](http://dx.doi.org/10.1603/0013-8746(2002)095[0711:DOPAWB]2.0.CO;2).
61. Ahmed MZ, Ren S, Xue X, Li XX, Jin G, Qiu BL. Prevalence of endosymbionts in *Bemisia tabaci* populations and their in vivo sensitivity to antibiotics. *Curr Microbiol.* 2010; 61:322-328. doi: 10.1007/s00284-010-9614-5.
62. Gueguen G, Vavre F, Gnankine O, Peterschmitt M, Charif D, Chiel E, et al. Endosymbiont metacommunities, mtDNA diversity and the evolution of the *Bemisia tabaci* (Hemiptera: Aleyrodidae) species complex. *Mol Ecol.* 2010; 19: 4365-4378. doi: 10.1111/j.1365-294X.2010.04775.x.
63. Bing XL, Yang J, Zchori-Fein E, Wang XW, Liu SS. Characterization of a newly discovered symbiont of the whitefly *Bemisia tabaci* (Hemiptera: Aleyrodidae). *Appl Environ Microb.* 2013; 79:569-575. doi: 10.1128/AEM.03030-12.
64. Santos-Garcia D, Vargas-Chavez C, Moya A, Latorre A, Silva FJ. Genome evolution in

- 1 the primary endosymbiont of whiteflies sheds light on their divergence. *Genome Biol*  
2 *Evol.* 2015; 7:873-888. doi: 10.1093/gbe/evv038.
- 3  
4  
5 65. Moran NA, Jarvik T. Lateral transfer of genes from fungi underlies carotenoid production  
6 in aphids. *Science.* 2010; 328:624-627. doi: 10.1126/science.1187113.
- 7  
8  
9  
10 66. Husnik F, Nikoh N, Koga R, Ross L, Duncan RP, Fujie F, et al. Horizontal gene transfer  
11 from diverse bacteria to an insect genome enables a tripartite nested mealybug symbiosis.  
12 *Cell.* 2013; 153:1567-1578. doi:10.1016/j.cell.2013.05.040.
- 13  
14  
15  
16  
17 67. De Gregorio E, Spellman PT, Tzou P, Rubin GM, Lemaitre B. The Toll and Imd  
18 pathways are the major regulators of the immune response in *Drosophila*. *EMBO J.*  
19 2002; 21:2568-2579. doi: 10.1093/emboj/21.11.2568.
- 20  
21  
22  
23  
24 68. Munson MA, Baumann P, Kinsey MG. *Buchnera gen. nov.* and *Buchnera aphidicola sp.*  
25 *nov.*, a taxon consisting of the mycetocyte-associated, primary endosymbionts of aphids.  
26 *Int J Syst Bacteriol.* 1991; 41:566-568. doi: 10.1099/00207713-41-4-566.
- 27  
28  
29  
30  
31 69. Gerardo NM, Altincicek B, Anselme C, Atamian H, Barribeau SM, de Vos M, et al.  
32 Immunity and other defenses in pea aphids, *Acyrtosiphon pisum*. *Genome Biol.* 2010;  
33 11:R21. doi: 10.1186/gb-2010-11-2-r21.
- 34  
35  
36  
37  
38  
39 70. Misof B, Liu S, Meusemann K, Peters RS, Donath A, Mayer C, et al. Phylogenomics  
40 resolves the timing and pattern of insect evolution. *Science.* 2014; 346:763-767. doi:  
41 10.1126/science.1257570.
- 42  
43  
44  
45  
46 71. Chu D, Zhang YJ, Brown JK, Cong B, Xu BY, Wu QJ, et al. The introduction of the  
47 exotic Q biotype of *Bemisia tabaci* from the Mediterranean region into China on  
48 ornamental crops. *Fla Entomol.* 2006; 89:168-174. doi: [http://dx.doi.org/10.1653/0015-](http://dx.doi.org/10.1653/0015-4040(2006)89[168:TIOTEQ]2.0.CO;2)  
49 4040(2006)89[168:TIOTEQ]2.0.CO;2.
- 50  
51  
52  
53  
54  
55  
56 72. Tao Q, Wang A, Zhang HB. One large-insert plant-transformation-competent BIBAC  
57 library and three BAC libraries of Japonica rice for genome research in rice and other  
58  
59  
60  
61

- grasses. *Theor Appl Genet.* 2002; 105:1058-1066. doi: 10.1007/s00122-002-1057-3.
- 1  
2  
3  
4  
5  
6  
7  
8  
9  
10  
11  
12  
13  
14  
15  
16  
17  
18  
19  
20  
21  
22  
23  
24  
25  
26  
27  
28  
29  
30  
31  
32  
33  
34  
35  
36  
37  
38  
39  
40  
41  
42  
43  
44  
45  
46  
47  
48  
49  
50  
51  
52  
53  
54  
55  
56  
57  
58  
59  
60  
61  
62  
63  
64  
65
73. Li R, Fan W, Tian G, Zhu H, He L, Cai J, et al. The sequence and de novo assembly of the giant panda genome. *Nature.* 2010; 463:311-317. doi:10.1038/nature08696.
74. You M, Yue Z, He W, Yang X, Yang G, Xie M, et al. A heterozygous moth genome provides insights into herbivory and detoxification. *Nat Genet.* 2013; 45:220-225. doi:10.1038/ng.2524.
75. Boetzer M, Henkel CV, Jansen HJ, Butler D, Pirovano W. Scaffolding pre-assembled contigs using SSPACE. *Bioinformatics.* 2011; 27:578-579. doi:10.1093/bioinformatics/btq683.
76. Benson G. Tandem repeats finder: a program to analyze DNA sequences. *Nucleic Acids Res.* 1999; 27:573-580. doi: 10.1093/nar/27.2.573.
77. Edgar RC, Myers EW. PILER: identification and classification of genomic repeats. *Bioinformatics.* 2005; 21:152-158. doi:10.1093/bioinformatics/bti1003.
78. Price AL, Jones NC, Pevzner PA. De novo identification of repeat families in large genomes. *Bioinformatics.* 2005; 21:351-358. doi:10.1093/bioinformatics/bti1018.
79. Xu Z, Wang H. LTR\_FINDER: an efficient tool for the prediction of full-length LTR retrotransposons. *Nucleic Acids Res.* 2007; 35:265-268. doi: 10.1093/nar/gkm286.
80. Parra G, Bradnam K, Ning Z, Keane T, Korf I. Assessing the gene space in draft genomes. *Nucleic Acids Res.* 2009; 37:289-297. doi: 10.1093/nar/gkn916.
81. Birney E, Clamp M, Durbin R. GeneWise and Genomewise. *Genome Res.* 2004; 14:988-995. doi:10.1101/gr.1865504.
82. Burge C, Karlin S. Prediction of complete gene structures in human genomic DNA. *J Mol Biol.* 1997; 268:78-94. doi:10.1006/jmbi.1997.0951.



- 1  
2  
3  
4  
5  
6  
7  
8  
9  
10  
11  
12  
13  
14  
15  
16  
17  
18  
19  
20  
21  
22  
23  
24  
25  
26  
27  
28  
29  
30  
31  
32  
33  
34  
35  
36  
37  
38  
39  
40  
41  
42  
43  
44  
45  
46  
47  
48  
49  
50  
51  
52  
53  
54  
55  
56  
57  
58  
59  
60  
61  
62  
63  
64  
65
83. Stanke M, Keller O, Gunduz I, Hayes A, Waack S, Morgenstern B. AUGUSTUS: ab initio prediction of alternative transcripts. *Nucleic Acids Res.* 2006; 34: W435-W439. PMID: 16845043.
  84. Wang XW, Luan JB, Li JM, Bao YY, Zhang CX, Liu SS. De novo characterization of a whitefly transcriptome and analysis of its gene expression during development. *BMC genomics.* 2010; 11:400. doi: 10.1186/1471-2164-11-400.
  85. Ye XD, Su YL, Zhao QY, Xia WQ, Liu SS Wang XW. Transcriptomic analyses reveal the adaptive features and biological differences of guts from two invasive whitefly species. *BMC genomics.* 2014; 15:370. doi: 10.1186/1471-2164-15-370.
  86. Su YL, Li JM, Li M, Luan JB, Ye XD, Wang XW, et al. Transcriptomic analysis of the salivary glands of an invasive whitefly. *PLoS One.* 2012; 7:e39303. doi:10.1371/journal.pone.0039303.
  87. Elsik CG, Mackey AJ, Reese JT, Milshina NV, Roos DS, Weinstock GM. Creating a honeybee consensus gene set. *Genome Biol.* 2007; 8:R13. doi: 10.1186/gb-2007-8-1-r13.
  88. Trapnell C, Williams BA, Pertea G, Mortazavi A, Kwan G, van Baren MJ, et al. Transcript assembly and quantification by RNA-Seq reveals unannotated transcripts and isoform switching during cell differentiation. *Nat Biotechnol.* 2010; 28:511-515. doi: 10.1038/nbt.1621.
  89. Kanehisa M, Goto S. KEGG: kyoto encyclopedia of genes and genomes. *Nucleic Acids Res.* 2000; 28:27-30. doi: 10.1093/nar/28.1.27.
  90. Bairoch A, Apweiler R. The SWISS-PROT protein sequence database and its supplement TrEMBL in 2000. *Nucleic Acids Res.* 2000; 28:45-48. doi: 10.1093/nar/28.1.45.
  91. Zdobnov EM, Apweiler R. InterProScan--an integration platform for the signature-recognition methods in InterPro. *Bioinformatics.* 2001; 17:847-848. doi:10.1093/bioinformatics/17.9.847.

- 1  
2  
3  
4  
5  
6  
7  
8  
9  
10  
11  
12  
13  
14  
15  
16  
17  
18  
19  
20  
21  
22  
23  
24  
25  
26  
27  
28  
29  
30  
31  
32  
33  
34  
35  
36  
37  
38  
39  
40  
41  
42  
43  
44  
45  
46  
47  
48  
49  
50  
51  
52  
53  
54  
55  
56  
57  
58  
59  
60  
61  
62  
63  
64  
65
92. Li H, Coghlan A, Ruan J, Coin LJ, Hériché JK, Osmotherly L, et al. TreeFam: a curated database of phylogenetic trees of animal gene families. *Nucleic Acids Res.* 2006; 34: 572-580. doi: 10.1093/nar/gkj118.
  93. Ruan J, Li H, Chen Z, Coghlan A, Coin LJ, Guo Y, et al. TreeFam: 2008 update. *Nucleic Acids Res.* 2008; 36:735-740. doi: 10.1093/nar/gkm1005.
  94. Guindon S, Dufayard JF, Lefort V, Anisimova M, Hordijk W, Gascuel O. New algorithms and methods to estimate maximum-likelihood phylogenies: assessing the performance of PhyML 3.0. *Syst Biol.* 2010; 59:307-321. doi: 10.1093/sysbio/syq010.
  95. Benton MJ, Donoghue PC. Paleontological evidence to date the tree of life. *Mol Biol Evol.* 2007; 24:26-53. doi: 10.1093/molbev/msl150.
  96. Donoghue PCJ, Benton MJ. Rocks and clocks: calibrating the Tree of Life using fossils and molecules. *Trends Ecol Evol.* 2007; 22:424-431. doi: 10.1016/j.tree.2007.05.005.
  97. Yang Z. PAML: a program package for phylogenetic analyses by maximum likelihood. *Comp Appl BioSci.* 1997; 13:555-556. doi: 10.1099/0022-1317-79-8-1951.
  98. Yang Z. PAML 4: phylogenetic analysis by maximum likelihood. *Mol Biol Evol.* 2007; 24:1586-1591. doi: 10.1093/molbev/msm088.
  99. De Bie T, Cristianini N, Demuth JP, Hahn MW. CAFE: a computational tool for the study of gene family evolution. *Bioinformatics.* 2006; 22:1269-1271. doi:10.1093/bioinformatics/btl097.
  100. Zhang J, Nielsen R, Yang Z. Evaluation of an improved branch-site likelihood method for detecting positive selection at the molecular level. *Mol Biol Evol.* 2005; 22:2472-2479. doi: 10.1093/molbev/msi237.
  101. Loytynoja A, Goldman N. Phylogeny-aware gap placement prevents errors in sequence alignment and evolutionary analysis. *Science.* 2008; 320:1632-1635. doi: 10.1126/science.1158395.

- 1  
2  
3  
4  
5  
6  
7  
8  
9  
10  
11  
12  
13  
14  
15  
16  
17  
18  
19  
20  
21  
22  
23  
24  
25  
26  
27  
28  
29  
30  
31  
32  
33  
34  
35  
36  
37  
38  
39  
40  
41  
42  
43  
44  
45  
46  
47  
48  
49  
50  
51  
52  
53  
54  
55  
56  
57  
58  
59  
60  
61  
62  
63  
64  
65
102. Talavera G, Castresana J. Improvement of phylogenies after removing divergent and ambiguously aligned blocks from protein sequence alignments. *Syst Biol.* 2007; 56:564-577. doi: 10.1080/10635150701472164.
103. Tamura K, Stecher G, Peterson D, Filipski A, Kumar S. MEGA6: molecular evolutionary genetics analysis version 6.0. *Mol Biol Evol.* 2013; 30:2725-2729. doi: 10.1093/molbev/mst197.
104. Cao X, He Y, Hu Y, Wang Y, Chen YR, Bryant B, et al. The immune signaling pathways of *Manduca sexta*. *Insect Biochem Mol Biol.* 2015; 62:64-74. doi:10.1016/j.ibmb.2015.03.006.
105. Waterhouse RM, Kriventseva EV, Meister S, Xi Z, Alvarez KS, Bartholomay LC, et al. Evolutionary dynamics of immune-related genes and pathways in disease-vector mosquitoes. *Science.* 2007; 316:1738-1743. doi: 10.1126/science.1139862.
106. Katoh K, Standley DM. MAFFT multiple sequence alignment software version 7. improvements in performance and usability. *Mol Biol Evol.* 2013; 30:772-80. doi: 10.1093/molbev/mst010.
107. Li R, Xie W, Wang S, Wu Q, Yang N, Yang X, et al. Reference gene selection for qRT-PCR analysis in the sweetpotato whitefly, *Bemisia tabaci* (Hemiptera: Aleyrodidae). *PLoS One.* 2013; 8: e53006. doi.org/10.1371/journal.pone.0053006.
108. Livak KJ, Schmittgen TD. Analysis of relative gene expression data using real-time quantitative PCR and the  $2^{-\Delta\Delta CT}$  method. *Methods.* 2001; 25: 402-408. doi:10.1006/meth.2001.1262.

## Additional files

### Supporting Figures

Figure S1. Schematic illustration of the assembly pipeline for *B. tabaci* Q genome based on the combined assemblies from WGS and BACs.

Figure S2. Gene family expansion and contraction in *B. tabaci* Q genome compared to other arthropods.

Figure S3. Phylogenetic trees for 11 horizontally transferred genes (HGTs).

Figure S4. Estimated divergence times among insect genomes using PAML *mcmctree*.

Figure S5. The RNA interference efficiency of nine CYP450 and three GST gene. mRNA levels of these genes were quantified by qRT-PCR in 96 hours of feeding on a diet containing dsEGFP and dsCYP450/dsGST. The mRNA levels are shown as a ratio relative to the levels for the reference gene (*EF1 $\alpha$* ). Values are means  $\pm$  SEMs (n=3).

## Supporting Tables

1  
2  
3 Table S1. Statistics of the whole genome sequencing data  
4

5  
6 Table S2. Repeat Masker analysis in 4 Hemiptera species  
7

8  
9 Table S3. Evidenced use within GLEAN MED/Q protein-coding genes  
10

11  
12 Table S4. Summary of GLEAN gene models  
13

14  
15 Table S5. Functional annotation of the MED/Q genome  
16

17  
18 Table S6. Orthologous gene comparison among genomes of 14 arthropod species  
19

20  
21 Table S7. Gene ontologies for gene families showing expansion on *Bemisia tabaci* branch  
22  
23 (FDR<0.05,  $p \leq 0.00097087378641$ )  
24

25  
26 Table S8. Results of gene family expansion (gene gain) and contraction (gene loss) analysis  
27

28  
29 Table S9. Gene ontology over-representation of gene families contracted on *Bemisia tabaci*  
30  
31 branch (FDR<0.05,  $p \leq 0.000572390572$ )  
32

33  
34 Table S10. Immune system-related and virus transport genes in phloem- and blood-feeding  
35  
36 insects  
37

38  
39  
40 Table S11. Genes involved in B vitamin biosynthesis in MED/Q  
41

42  
43 Table S12. Genes involved in B vitamin biosynthesis in *Candidatus Hamiltonella* defense  
44

45  
46 Table S13. Horizontally transferred genes involved in amino acid biosynthesis in MED/Q  
47

48  
49 Table S14. Comparison of transaminases in three symbiotic systems *Bemisia tabaci*/Portiera,  
50  
51 *Acyrtosiphum pisum*/Buchnera and *Nilaparvata lugens*/Yeast-like  
52

53  
54 Table S15. Quality control of assembled genome  
55

56  
57 Table S16. Primers used in this study.  
58  
59  
60  
61

**Table 1. Statistics of genome assembly and annotation for MED/Q**

|                                   |                |
|-----------------------------------|----------------|
| Assembled genome size (Mb)        | 658            |
| Number of scaffolds (>100 bp)     | 5,003          |
| Total size of assembled scaffolds | 658,367,382 bp |
| N50 (scaffolds)                   | 436,791 bp     |
| Longest scaffold                  | 2,857,362 bp   |
| Number of contigs (>100 bp)       | 30,873         |
| Total size of assembled contigs   | 638,748,832 bp |
| N50 (contigs)                     | 44,388         |
| Longest contig                    | 362,835 bp     |
| GC content                        | 0.38           |
| Number of GLEAN gene models       | 20,786         |
| Mean transcript length            | 10,043 bp      |
| Mean coding sequence length       | 1,504 bp       |
| Mean number of exons per gene     | 5.12           |
| Mean exon length                  | 294 bp         |
| Mean intron length                | 1,963 bp       |
| Total size of TEs                 | 265,205,801 bp |
| TEs proportion of the genome      | 0.4029         |

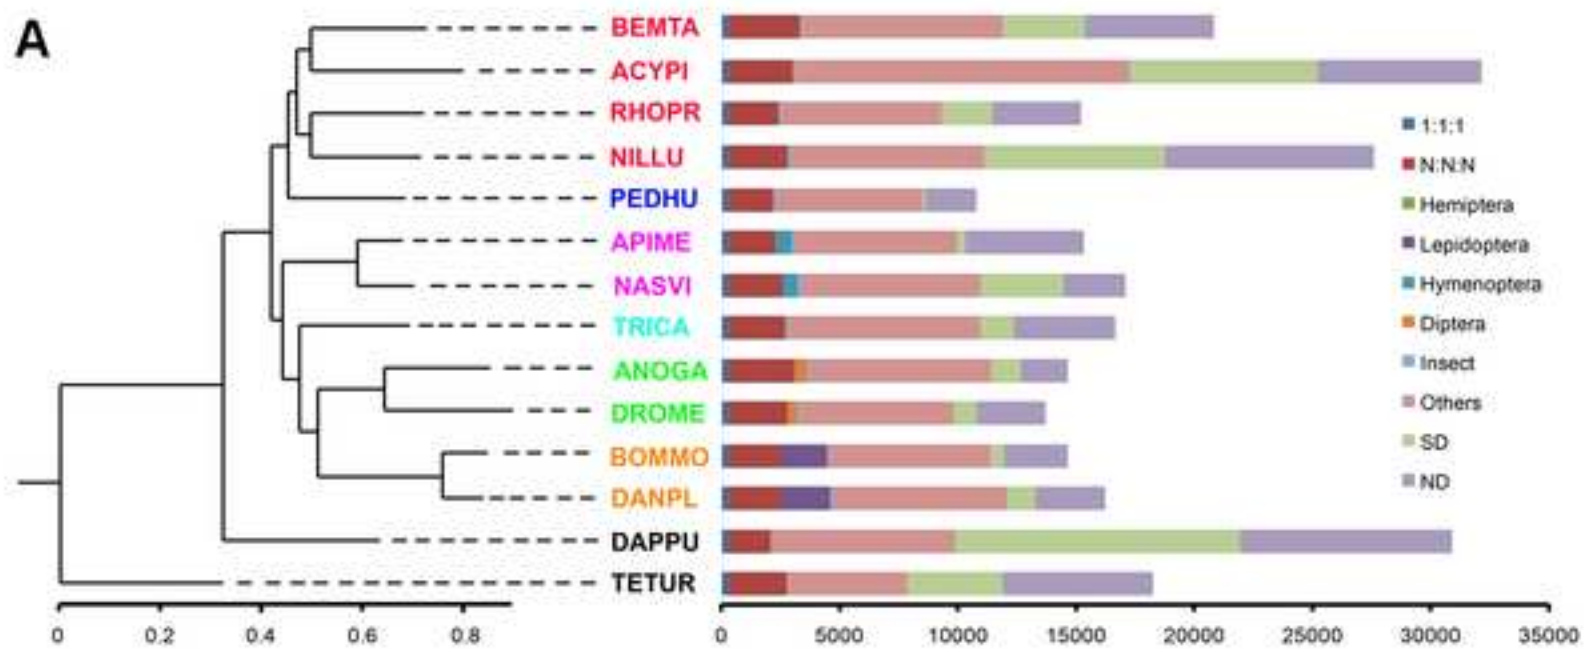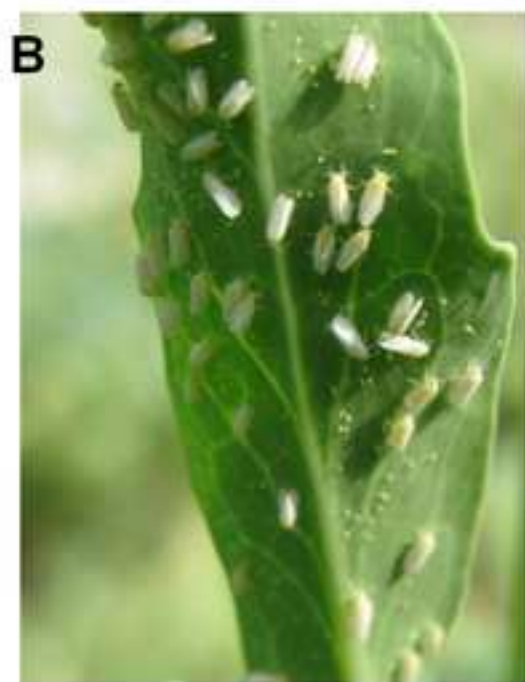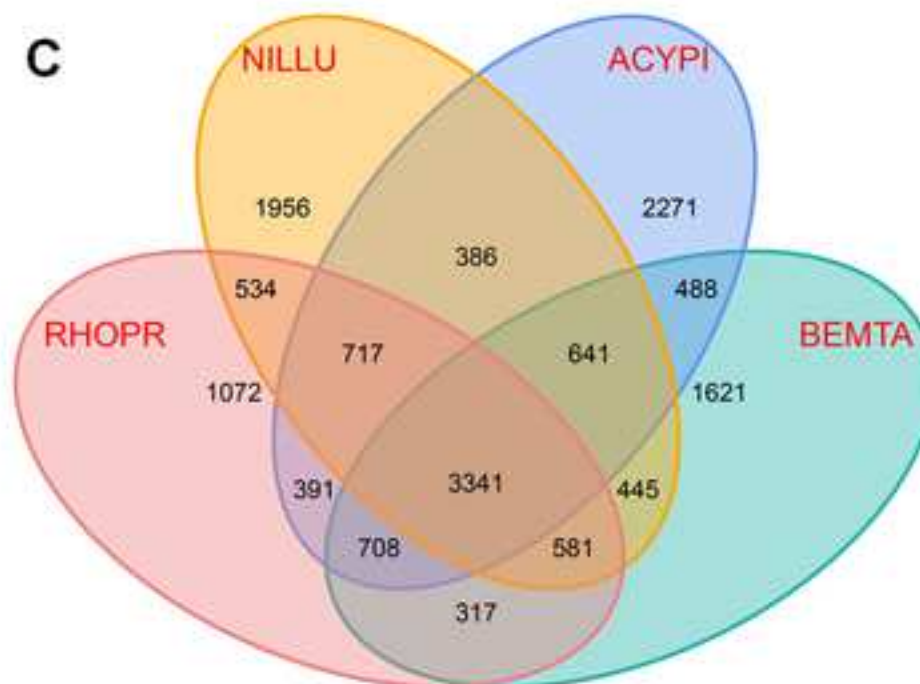



| A      | P450 | UGT | GST | ABC | COE | Total |                |
|--------|------|-----|-----|-----|-----|-------|----------------|
| BEMTA* | 153  | 63  | 21  | 59  | 51  | 347   | Phloem feeding |
| ACYPI* | 83   | 58  | 32  | 71  | 37  | 281   |                |
| NILLU* | 65   | 23  | 9   | 57  | 56  | 210   |                |
| RHOPR  | 102  | 15  | 7   | 55  | 49  | 228   | Blood feeding  |
| PEDHU  | 39   | 4   | 12  | 38  | 20  | 113   |                |
| ANOGA  | 115  | 26  | 36  | 59  | 48  | 284   |                |
| DROME  | 85   | 34  | 32  | 53  | 35  | 239   |                |
| APIME  | 54   | 12  | 11  | 41  | 29  | 147   |                |
| NASVI  | 96   | 23  | 19  | 51  | 46  | 235   |                |
| TRICA* | 126  | 28  | 30  | 13  | 51  | 248   |                |
| BOMMO* | 72   | 33  | 27  | 55  | 89  | 276   |                |

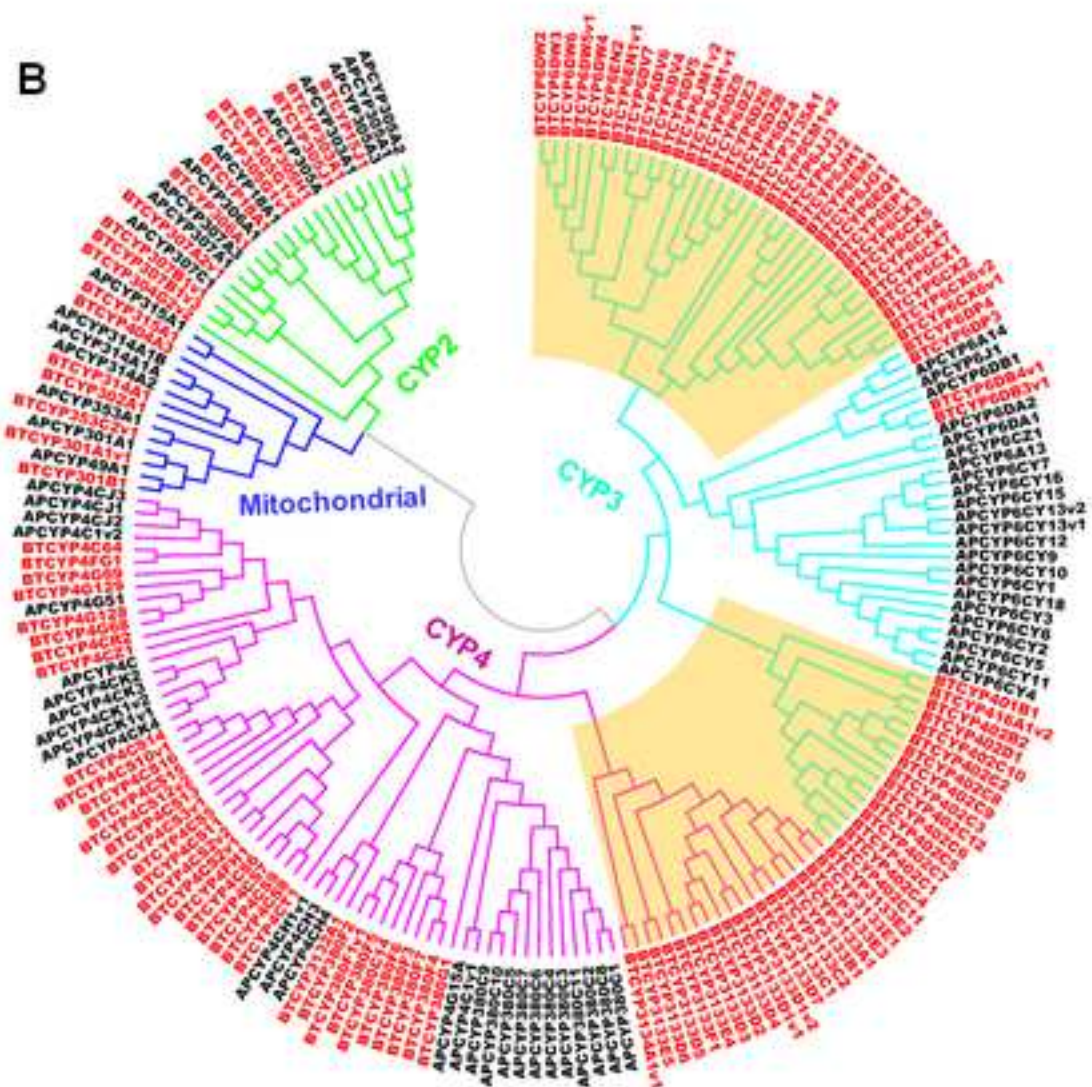



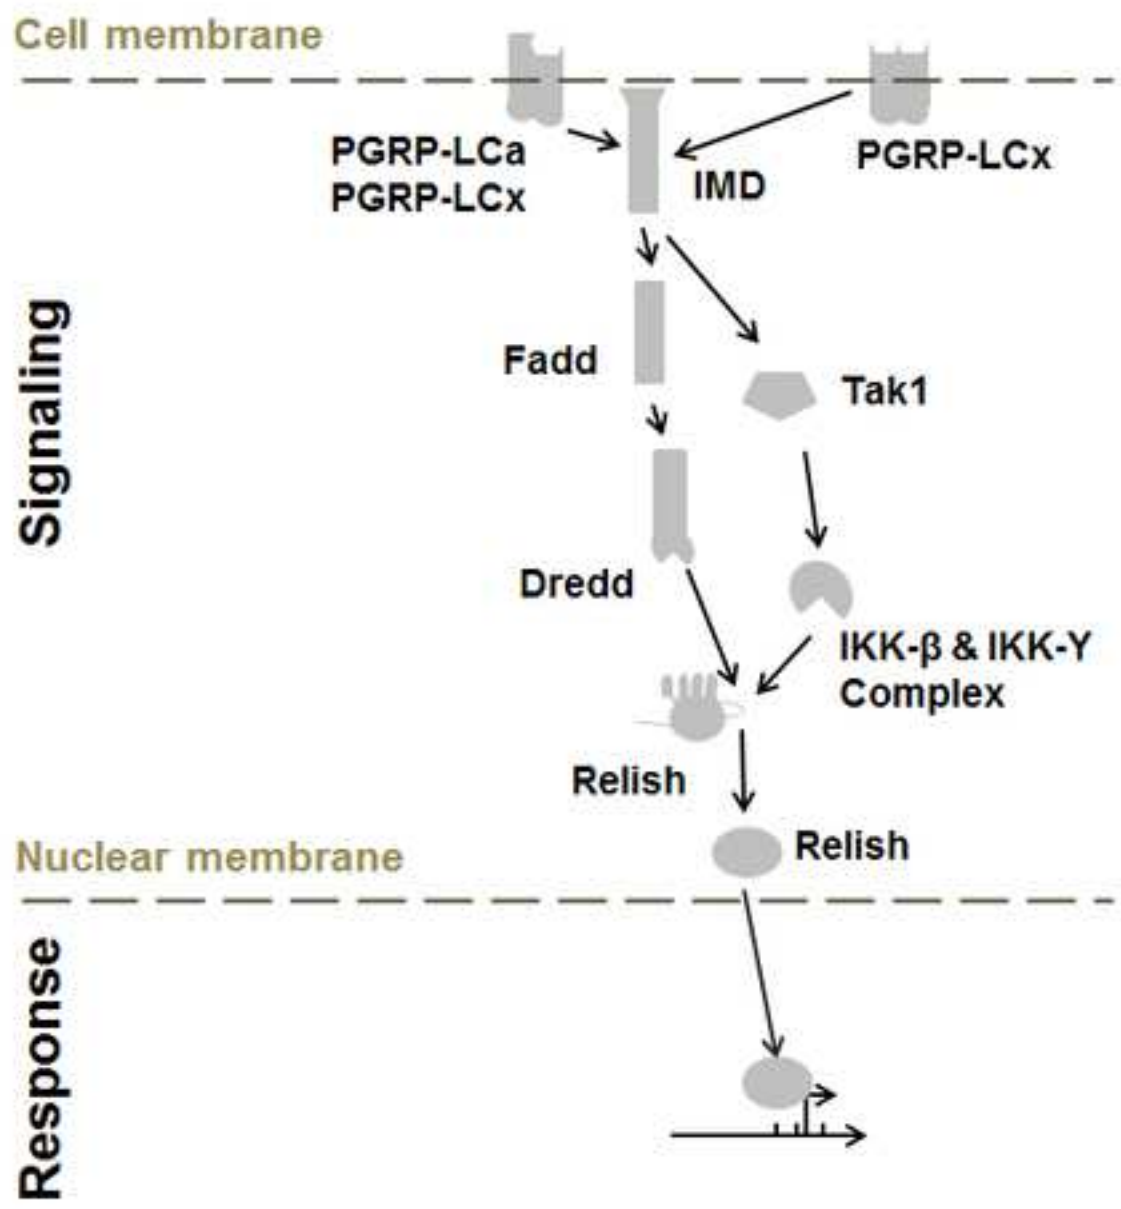

|          | Bt | Ap | NI |
|----------|----|----|----|
| PGRP-LCa | 0  | 0  | 0  |
| PGRP-LCx | 0  | 0  | 1  |
| IMD      | 0  | 0  | 1  |
| Fadd     | 0  | 0  | 0  |
| Dredd    | 0  | 0  | 1  |
| Tak1     | 0  | 0  | 1  |
| IKK-β    | 0  | 1  | 1  |
| IKK-γ    | 0  | 0  | 1  |
| Relish   | 0  | 0  | 1  |
| Relish   | 0  | 0  | 1  |

**A**

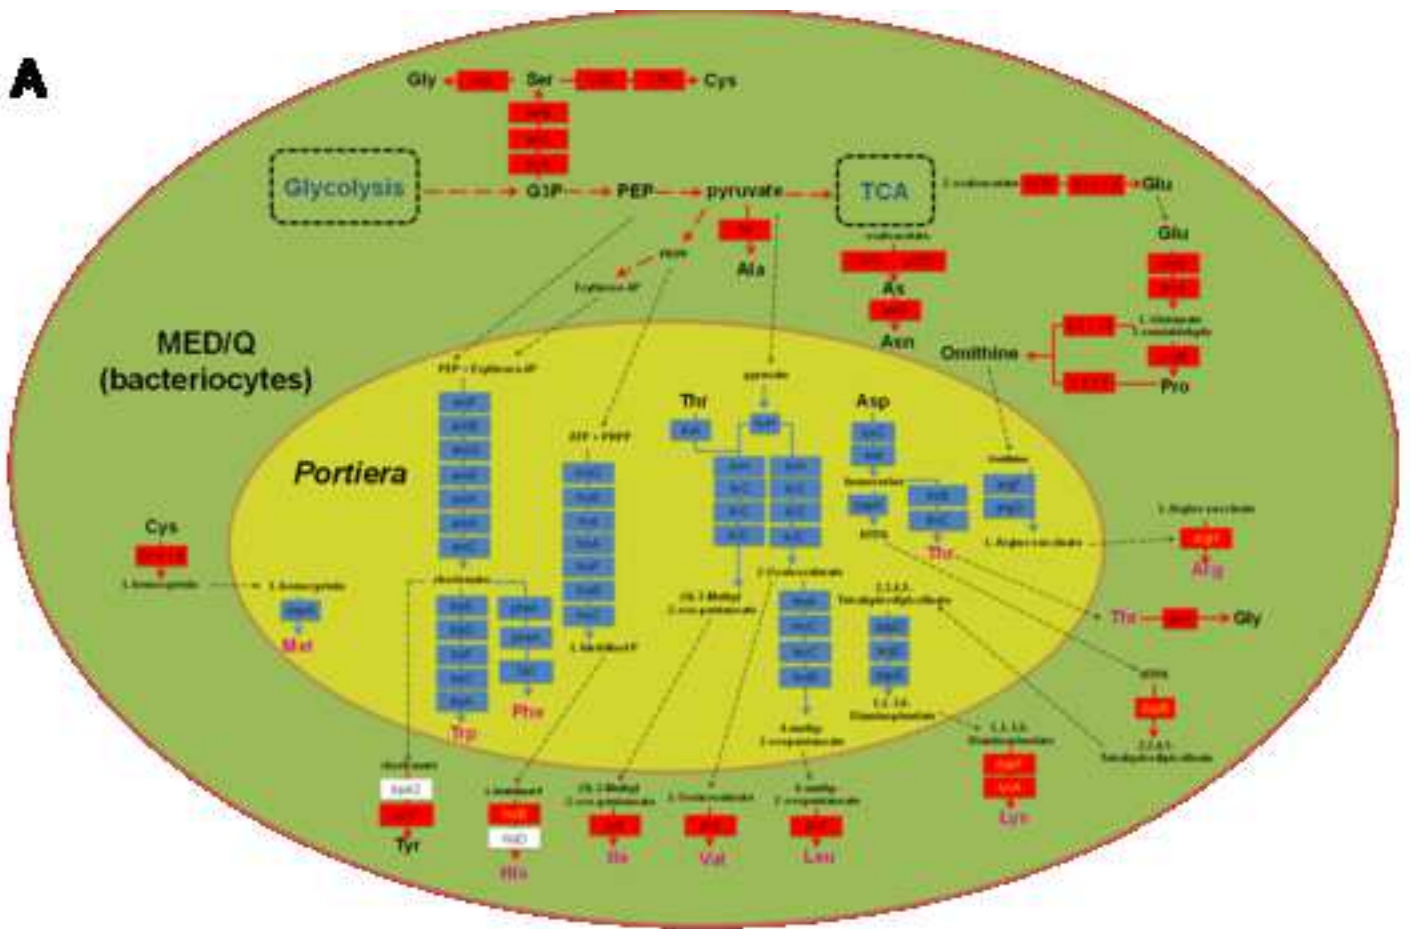

**B**

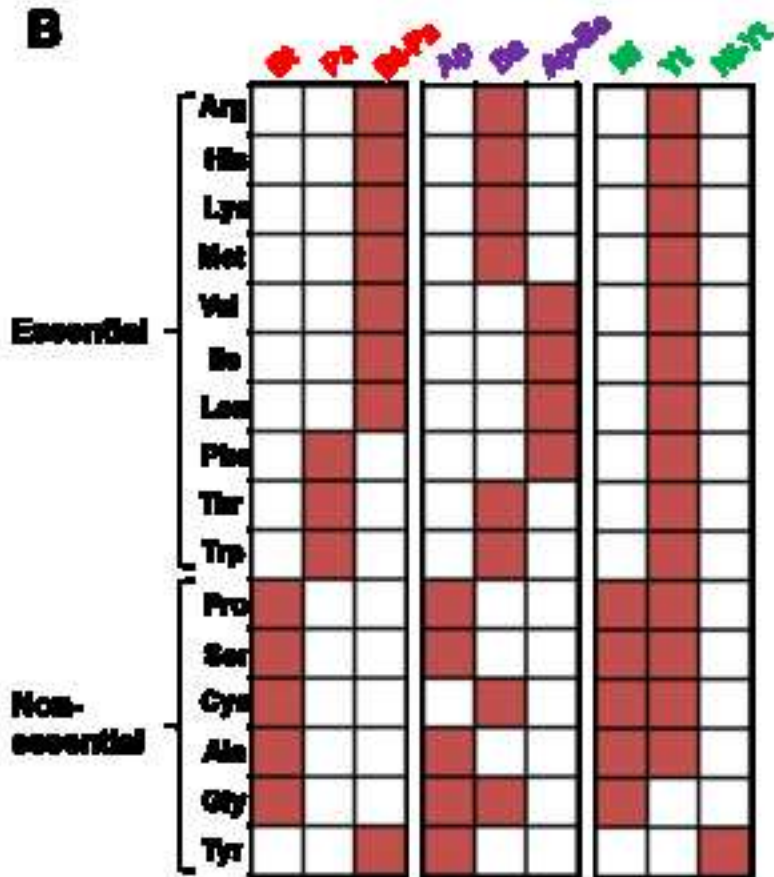

**C**

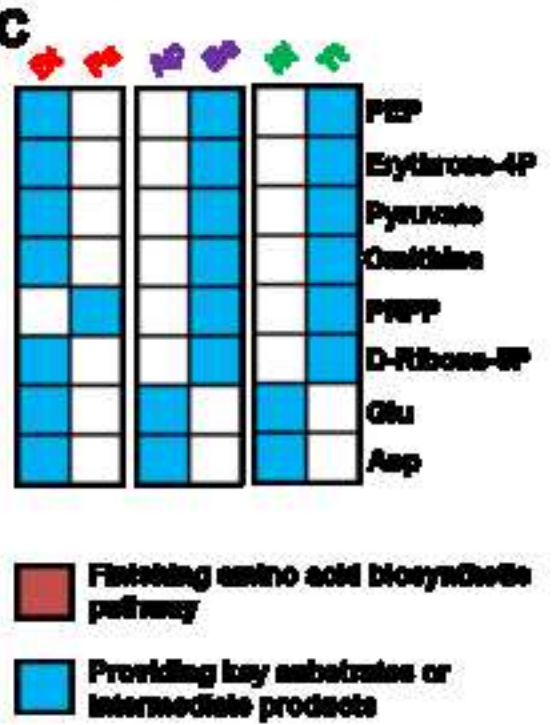

A

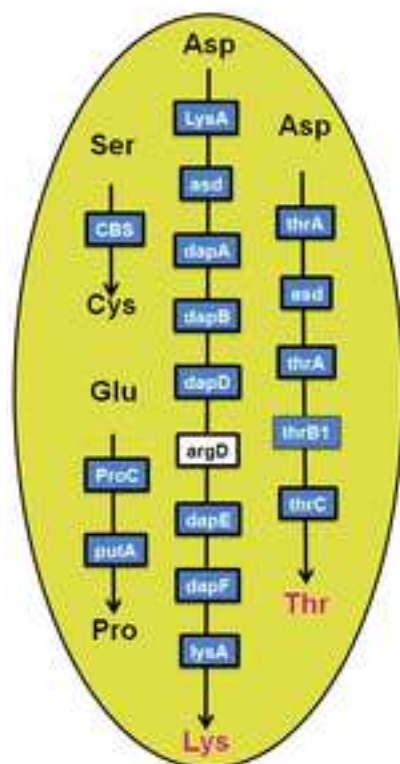

B Pimeloyl-coA → bioF → bioA → bioD → bioB → Biotin

L-Asp → 1.4.3.16 → NadA → 2.4.2.19 → 2.7.7.18 → Deamino-NAD<sup>+</sup> → 6.3.1.5 → NAD

1-(5-Phospho-ribosyl)-aminoimidazole → 4.1.99.17 → 2.7.4.2  
 5-(2-hydroxyethyl)-4-methyl-thiazole → 2.7.1.50  
 → 2.5.1.3 → 2.7.4.16 → Thiamine diphosphate

GTP → 3.5.4.25 → 3.5.4.26 → 1.1.1.19 → 3.1.3.-  
 Ribulose 3-phosphate → 4.1.99.12 → 2.5.1.78 → 2.5.1.8 → Riboflavin → 2.7.1.26 → 2.7.7.2 → FAD

GTP → 2.8.1.12 → 4.1.99.18 → 3.5.4.18 → 3.1.3.1 → 4.1.2.25 → 2.7.6.3 → 2.5.1.5 → 6.3.2.12 → 1.5.1.3 → Folate

D-Erythrose 4-phosphate → 1.2.1.72 → 1.1.1.290 → 2.6.1.52 → 1.1.1.262 → spontaneous → 2.6.99.2 → 1.4.3.5 → Pyridoxal 3-phosphate

L-Aspartate → 2.6.1.16 → 2.1.2.11 → 1.1.1.109 → 6.3.2.1 → 2.7.1.33 → 6.3.2.5 → 4.1.1.38 → 2.7.7.3 → 2.7.1.24 → CoA

L-Glutamate → 6.1.1.17 → 1.2.1.70 → 5.4.3.8 → 4.2.1.24 → 2.5.1.81 → 4.2.1.76 → 4.1.1.37 → 1.3.3.3 → 1.3.3.4 → 4.99.1.1 → Heme



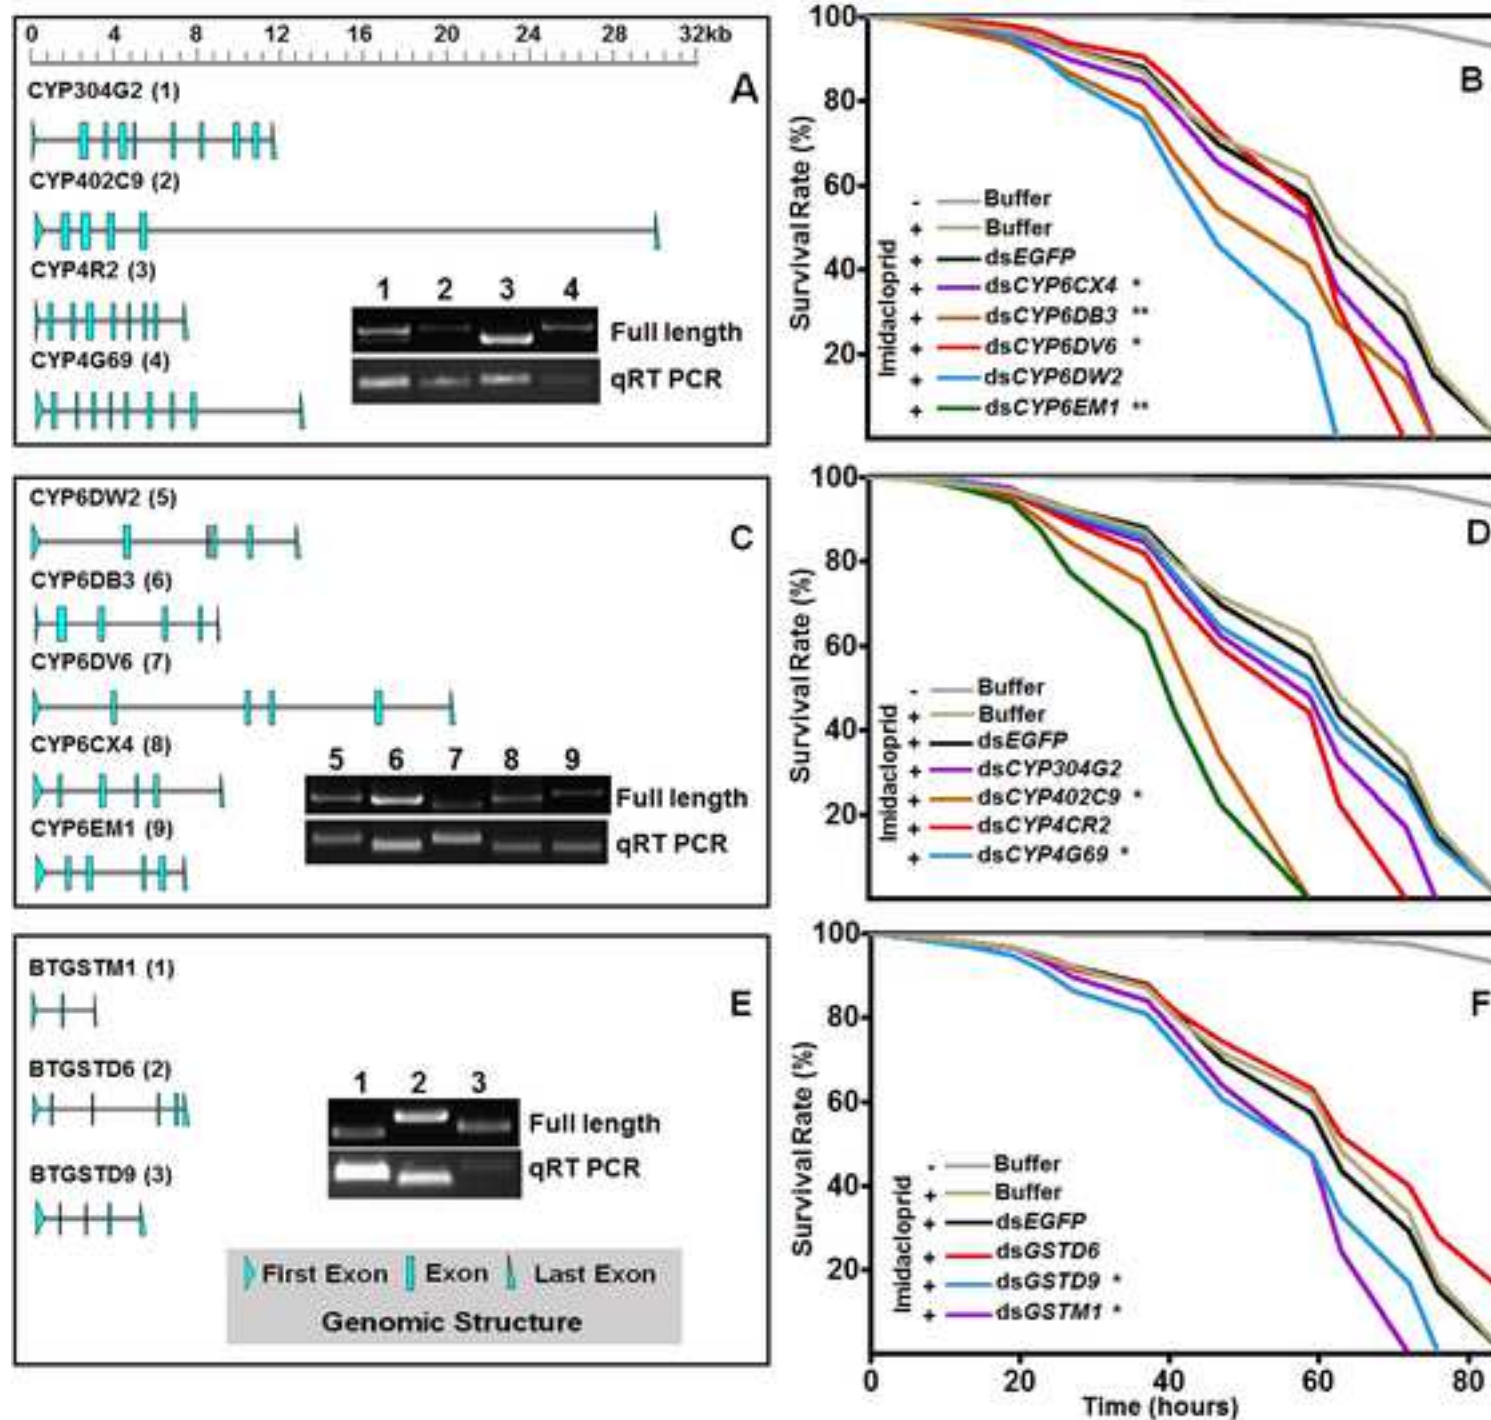



Click here to access/download  
**Supplementary Material**  
S1\_Fig.tif





Click here to access/download  
**Supplementary Material**  
S2\_Fig.tif





Click here to access/download  
**Supplementary Material**  
S3\_Fig.tif



Click here to access/download  
**Supplementary Material**  
S4\_Fig.tif





Click here to access/download  
**Supplementary Material**  
S5\_Fig.tif





Click here to access/download  
**Supplementary Material**  
S1\_Table.docx





Click here to access/download  
**Supplementary Material**  
S2\_Table.docx





Click here to access/download  
**Supplementary Material**  
S3\_Table.docx





Click here to access/download  
**Supplementary Material**  
S4\_Table.docx





Click here to access/download  
**Supplementary Material**  
S5\_Table.docx



Click here to access/download  
**Supplementary Material**  
S6\_Table.docx



Click here to access/download  
**Supplementary Material**  
S7\_Table.docx







Click here to access/download  
**Supplementary Material**  
S8\_Table.docx





Click here to access/download  
**Supplementary Material**  
S9\_Table.docx



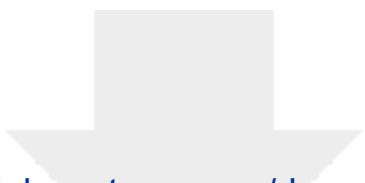

Click here to access/download  
**Supplementary Material**  
S10\_Table.docx





Click here to access/download  
**Supplementary Material**  
S11\_Table.docx



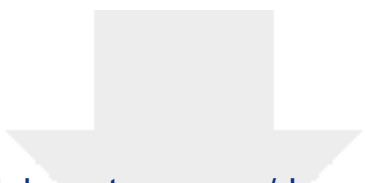

Click here to access/download  
**Supplementary Material**  
S12\_Table.docx



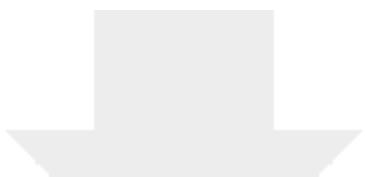

Click here to access/download  
**Supplementary Material**  
S13\_Table.docx





Click here to access/download  
**Supplementary Material**  
S14\_Table.docx



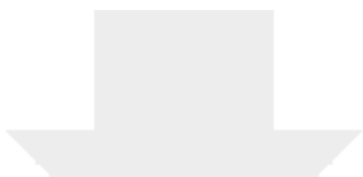

Click here to access/download  
**Supplementary Material**  
S15\_Table.doc







Click here to access/download  
**Supplementary Material**  
S16\_Table.docx



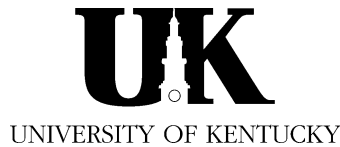**College of Agriculture**

Department of Entomology  
Office of the State Entomologist  
S-225 Agriculture Science Center-N  
Lexington, KY 40546-0091

**RE: MS No. GIGA-D-16-00061****December 8 2016**

Hans Zauner  
Assistant Editor  
*GigaScience*

Dear Hans:

Below, please find our descriptions of revisions to manuscript GIGA-D-16-00061 entitled "The invasive Q-type *Bemisia tabaci* genome: a tale of gene loss and gene gain". We have followed the vast majority of reviewer suggestions, and have no absolute disagreements/rebuttals to any reviewer comments. As a result, we now submit what is hopefully a significantly improved manuscript that provides a more convincing depiction of our results and conclusions. We are hopeful that the work will now meet your standards for publication as a "Research Article".

**EDITOR'S COMMENTS**

Your manuscript "The invasive Q-type *Bemisia tabaci* genome: a tale of gene loss and gene gain" (GIGA-D-16-00061) has been assessed by two reviewers. Although it is of interest, we are unable to consider it for publication in its current form. The reviewers have raised a number of points which we believe would improve the manuscript and may allow a revised version to be published in GigaScience.

Reviewer 2, Denis Tagu, feels the genome data are of interest, but more biological experiments would be necessary to test hypotheses. Along the same lines, referee 1, Laura Boykin, feels the manuscript lacks defined scientific questions.

If you are confident that you can provide sufficient additional biological data to convince the referees, we would be able to consider a revised manuscript as "Research Article".

However, you may prefer to revise the submission as a "Data Note" - see <http://gigascience.biomedcentral.com/submission-guidelines/preparing-your-manuscript/data-note>

If you decide to revise your manuscript as a "Data Note", you should concentrate on providing a useful dataset, transparently described in detail for future users and the research community.

In any case, please also include BUSCO analysis in a revised manuscript, as suggested by Denis Tagu.

I notice that Laura Boykin refers to the nomenclature issues surrounding the *B. tabaci* species complex. I do not think that this controversial topic should be at the forefront of a GigaScience article, which is about the genome sequence. Nevertheless, I feel that it is appropriate to cite and briefly outline the relevant recent literature dealing with *B. tabaci* nomenclature. Our readers

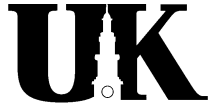

UNIVERSITY OF KENTUCKY

**College of Agriculture**

*Department of Entomology*

*Office of the State Entomologist*

*S-225 Agriculture Science Center-N*

*Lexington, KY 40546-0091*

should get a brief, but complete and unbiased overview of the published arguments that have been put forward in this debate.

The reports are below. Please also take a moment to check our website at <http://giga.edmgr.com/> for any additional comments that were saved as attachments.

If you are able to fully address these points, we would encourage you to submit a revised manuscript to GigaScience. Please note that we will seek further advice from referees before making a decision on your revised submission.

Once you have made the necessary corrections, please submit online at:

<http://giga.edmgr.com/>

If you have forgotten your username or password please use the "Send Login Details" link to get your login information. For security reasons, your password will be reset.

Please include a point-by-point within the 'Response to Reviewers' box in the submission system. Please ensure you describe additional experiments that were carried out and include a detailed rebuttal of any criticisms or requested revisions that you disagreed with. Please also ensure that your revised manuscript conforms to the journal style, which can be found in the Instructions for Authors on the journal homepage.

The due date for submitting the revised version of your article is 08 Dec 2016.

I look forward to receiving your revised manuscript soon.

Best wishes,

Hans Zauner

GigaScience

[www.gigasciencejournal.com](http://www.gigasciencejournal.com)

**RESPONSE: Reviewer and editor's constructive criticisms and suggestions are well received. Based on Drs Denis Tagu and Laura Boykin's suggestions, additional empirical experiments have been carried out to examine the hypotheses derived from this genome sequencing effort and to address a specific biological question. Generally, most of the suggested revisions involving minor changes have been incorporated into the revised manuscript. The following is a point-to-point response to reviewers' comments:**



UNIVERSITY OF KENTUCKY

College of Agriculture  
Department of Entomology  
Office of the State Entomologist  
S-225 Agriculture Science Center-N  
Lexington, KY 40546-0091

## REVIEWERS' COMMENTS

### Reviewer: 1

The article needs to be greatly improved but very important data. After reading the article I'm left asking myself- why did the team sequence the genome?

The title is using incorrect nomenclature for this species complex. All references to biotype are obsolete. Please see the literature below and revise.

Key literature surrounding the nomenclature of the species complex are missing. References 9 and 10 are outdated. I recommend a complete literature search of the topic but read

1. Wang, H.L., J. Yang, L. M. Boykin, Q.Y. Zhao, Y.J. Wang, S.S. Liu, X.W. Wang. 2014. Development, characterization and analysis of microsatellite markers from the transcriptomes of three whitefly *Bemisia tabaci* species. Scientific Reports. doi:10.1038/srep06351.
2. Tay, W.T., G. A. Evans, L.M. Boykin, P.J. De Barro. 2012. Will the real *Bemisia tabaci* please stand up? PLoS ONE 7(11): e50550. doi:10.1371/journal.pone.0050550.
3. Boykin, L.M., K.F. Armstrong, L. Kubatko, and P. De Barro. 2012. Species Delimitation and Global Biosecurity. Evolutionary Bioinformatics 8: 1-37.
4. Boykin, L.M. 2014. *Bemisia tabaci* nomenclature: Lessons learned. Pest Management Science 70:1454-59.

Avoid the "sibling" species terminology. Remove all reference to biotype throughout the manuscript. What is "strain selection"? Later in the paper MED/Q is used. Be consistent with the naming.

**RESPONSE: We echo Dr. Laura Boykin's sentiments about the nomenclature of the *Bemisia tabaci* species complex. According to her suggestion, we eliminated "biotype" throughout the manuscript and replaced "sibling" with "cryptic" species. "Strain selection" has been removed to avoid confusion.**

**As for the references, we included all four publications recommended by the reviewer. The debate over *Bemisia tabaci* as a complex species or species complex has been over a half century. To acknowledge this part of the history, and also to show "MED/Q was inadvertently introduced into several geographic locations worldwide, and became established throughout China", we would like to not exclude the references referring B. *tabaci* as biotypes. References 9 and 10 (listed here) represent some of the major discoveries from our research group, and were published recently in well-respected peer-reviewed journals. The nomenclature in these publications is debatable; however, the contents are relevant and up-to-date.**

9. Pan HP, Preisser EL, Chu D, Wang SL, Wu QJ, Carriere Y, et al. Insecticides promote viral outbreaks by altering herbivore competition. Ecol Appl. 2015; 25:1585-1595. PMID: 26552266.
10. Liu BM, Yan FM, Chu D, Pan HP, Jiao XG, Xie W, et al. Multiple forms of vector manipulation by a plant-infecting virus: *Bemisia tabaci* and tomato yellow leaf curl virus. J Virol. 2013; 87:4929-37. doi:10.1128/JVI.03571-12.



UNIVERSITY OF KENTUCKY

College of Agriculture

Department of Entomology

Office of the State Entomologist

S-225 Agriculture Science Center-N

Lexington, KY 40546-0091

The introduction does not properly review the literature or set up the read for the study that has been conducted or why it is important to have a genome for this particular *B. tabaci* species.

The discussion need to be rewritten completely. There are no scientific questions that were set out to be answered with this genome paper. I recommend reading:

<http://bfg.oxfordjournals.org/content/early/2016/06/22/bfgp.elw026.long> and paying attention to

the reference: <http://www.sciencedirect.com/science/article/pii/S1471492214000762>

The days of "sequence-first-ask-questions-later" are over and this paper needs to be greatly improved with well defined research questions relevant to *Bemisia tabaci* species before it can be published anywhere.

**RESPONSE: Based on reviewer's suggestion, we carried out additional experiments to address specific biological questions. We totally agree that genome sequencing should have clear biological purposes. With the additional RNAi-based functional data, we elected "insecticide resistance" as the focal point to reorganize and rewrite the discussion in the revised manuscript.**

#### Reviewer: 2

I have reviewed this *Bemisia* genome paper with interest: this is a long time that the community is expecting the release of the genome of this Hemipteran pest, and I am satisfied to see that a consortium tackled the difficulty. This is a regular genome paper whose aim I guess is to provide basic data of an annotated genome and a few analyses. There is thus an interest to publish it, if the community has access to a well-structured genome database of *B. tabacci*, so that the community will still improve annotation and provide new knowledge with other analyses. My first recommendation is thus to provide this access, more than from NCBI. I suggest the authors to contact the i5k community who developed a dedicated database for insects, with a nice interface allowing search, blast and web Apollo annotation (I am not member of this i5k database!).

**RESPONSE: To share the genome information using i5K database platform is a great idea, we will certainly contact i5K community after the conclusion of this publication. In the meantime, we have already uploaded the genome sequence onto NCBI and GigaDB. NCBI maintains genome sequences of plants, animals and microbes, and can be readily accessed through user-friendly interfaces, including blast, Map Viewer, and CD Tree. GigaDB contains 268 discoverable, tractable and citable databases that are available for public download and use. Therefore, we are comfortable using these two databases to share *B. tabacci* genomic resources.**

As I said before, the general analyses are global, and centered on specific gene families such as detoxification (in relation to insecticide resistance and host plant interactions) and immune system (in relation to endosymbiont relationship). There are thus many other gene families that would deserve analyses but I understand that this might not be essential for the paper. But as the paper focuses on a small number of family genes, I would expect more biological

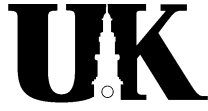

UNIVERSITY OF KENTUCKY

College of Agriculture  
Department of Entomology  
Office of the State Entomologist  
S-225 Agriculture Science Center-N  
Lexington, KY 40546-0091

experiments that would allow testing some of the hypotheses suggested by the authors. For instance, authors could provide some RNA expression data of candidate genes (e.g. P450) on different host plants or insecticides, or from different *Bemisia* populations with others insecticide resistance profiles. Or some experiments on the IMD pathways such as the one provided for the *A. pisum* paper. I don't say the authors should provide all these analyses, but at least put more biological data.

**RESPONSE: Based on Dr Denis Tagu's suggestion, we selected one of the main interests from our group, insecticide resistance, as the focal point for the discussion section. A total of 12 genes encoding detoxification enzymes, including 9 P450s and 3 GSTs, were subjected to RNAi-based functional validation studies to investigate their potential involvement in the imidacloprid resistance.**

The hypothesis of HGT is also interesting, but it is known that final demonstration is complicated. So to lower the fact that this is an HGT. It could be, but this remains to be demonstrated. please revise a bit the text

**RESPONSE: Based on reviewer's suggestion, we toned down the HGT hypothesis.**

Another trait of *Bemisia* is the transmission of plant viruses, as the authors several times mention it in the text. I would expect some gene family analysis of proteins that possibly play roles in virus transport (vesicle processes?).

**RESPONSE: Most recently, a group at the Cornell University published *Bemisia B* genome (Chen et al., 2016) with a focus on the genomic signatures contributing to virus transmission. We cited this work in the revised manuscript.**

**Chen et al. 2016. The draft genome of whitefly *Bemisia tabaci* MEAM1, a global crop pest, provides novel insights into virus transmission, host adaptation, and insecticide resistance. BMC Biology.**

The text needs strong English editing. Some parts are OK, but others are different to follow. I suggest the English-native co-authors carefully check all the manuscript, including figure and table legends.

**RESPONSE: Revisions have been made according to reviewer's suggestion.**

Other minor points:

Does the strain that have been sequenced disseminate plant viruses?

**RESPONSE: Yes, *B. tabaci* Q is notorious for its ability to transmit plant viruses.**

Males are haploid. For Hymenoptera genome projects, males are usually used for sequencing in order to get rid off heterozygosity. I am not a specialist of whitefly biology, but why did not you use only male individuals for this genome project?

**RESPONSE: We are aware of the strategies to minimizing the heterozygosity. However, for *B. tabaci*, it is difficult to distinguish the adult sex with the naked eyes, its size is too small to generate enough genetic materials individually for the genome sequencing. We, therefore, used unsexed, mass collection of *B. tabaci* adults for the sequencing.**

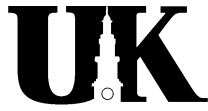

The authors used CEGMA for quality control of sequencing and assembly. I would suggest using BUSCO which proposed a larger set of conserved proteins for Insects or Arthropods. The authors will thus have a better assessment of their genome I guess.

**RESPONSE:** Based on reviewer's suggestion, we used BUSCO to evaluate the quality of *B. tabaci* genome, gene set, and transcriptome. There are 2,675 conserved arthropod proteins in total. As shown in the following table, we have detected 79% complete and fragmented BUSCOs in *B. tabaci* genome, 88% in gene set, and 70% in transcriptome.

| Pattern                         | Genome |     | Gene set |      | Transcriptome |     |
|---------------------------------|--------|-----|----------|------|---------------|-----|
|                                 | Number | %   | Number   | %    | Number        | %   |
| Complete BUSCOs                 | 1399   | 52% | 2105     | 78%  | 1276          | 47% |
| Complete and single-copy BUSCOs | 1118   | 42% | 1434     | 54%  | 985           | 10% |
| Complete and duplicated BUSCOs  | 281    | 10% | 671      | 25%  | 291           | 11% |
| Fragmented BUSCOs               | 706    | 26% | 257      | 9.6% | 595           | 22% |
| All (Complete and Fragmented)   | 2105   | 79% | 2362     | 88%  | 1871          | 70% |
| Missing BUSCOs                  | 570    | 21% | 313      | 11%  | 804           | 30% |

Based on this assessment, we would like to stay with the CEGMA analysis in this manuscript.

The authors could check within the non-assembled reads whether some missing genes that are not present in the assembly might be there, or even other bacterial sequences/genomes.

**RESPONSE:** 1) We mapped all WGS clean data covering different insert libs from 170bp to 40kb into *B. tabaci* MED/Q-type genome by SOAPaligner/soap2 V2.21t. Then non-assembled reads were filtered to assemble through software SOAPdenovo, and a draft sequence with 385Mb genome size was constructed. 2) In order to check whether any sequence existed in previous *B. tabaci* MED/Q-type genome, the 385Mb assembled sequence was again aligned to *B. tabaci* MED/Q-type genome with software blast and filtered 65Mb unmapped-assembled sequences (333,000 sequences). 3) Functional analysis was utilized to analyze the composition of these unmapped sequences through mapping them to NT database by software blast. On one hand, we mapped these unmapped-assembled sequences into the transcript sequences to search EST sequences by software blat. Secondly, a homolog based alignment with *Acyrtosiphon pisum* was ran by software Blast and Genewise. And then, we merged the gene set through Glean and got nine genes. Finally, we aligned these nine genes into *B. tabaci* MED/Q-type coding genes and into *B. tabaci* MED/Q-type genome by blast. Results shown four genes were successfully mapped into the *B. tabaci* MED/Q coding genes, and five not. That is, we got five unmapped genes, which might be missing gene in the present assemble. Functional analysis was again to search their function in NR database from NCBI by blast, and all these five genes were all annotated as gene indeed belong to *B. tabaci* (Tables 1 and 3). On the other hand, we found these unmapped-assembled sequences mainly include bacteria sequences from the following species (Table 2).

**Table 1. Function analysis with NR database of missing genes**

| Gene ID | Description                                                                       | Max score | Total score | Query cover | E value | Identity | Accession      |
|---------|-----------------------------------------------------------------------------------|-----------|-------------|-------------|---------|----------|----------------|
| Gene1   | PREDICTED: rho GTPase-activating protein 190 isoform X1 [ <i>Bemisia tabaci</i> ] | 179       | 179         | 0.81        | 2E-50   | 0.97     | XP_018903139.1 |
| Gene2   | PREDICTED: DNA polymerase epsilon catalytic subunit A [ <i>Bemisia tabaci</i> ]   | 272       | 272         | 0.94        | 5E-82   | 0.98     | XP_018915083.1 |
| Gene5   | PREDICTED: lysosomal alpha-glucosidase-like [ <i>Bemisia tabaci</i> ]             | 259       | 259         | 0.99        | 2E-83   | 0.99     | XP_018911552.1 |
| Gene6   | PREDICTED: acetylcholinesterase [ <i>Bemisia tabaci</i> ]                         | 209       | 209         | 1           | 2E-61   | 1        | XP_018906011.1 |
| Gene7   | PREDICTED: MIF4G domain-containing protein isoform X2 [ <i>Bemisia tabaci</i> ]   | 106       | 106         | 1           | 3E-26   | 1        | XP_018899706.1 |

**Table 2. The organisms of unmapped-assemble sequences**

| Organism                          | Mapped sequence number |
|-----------------------------------|------------------------|
| <i>Candidatus Hamiltonella</i>    | 931                    |
| <i>Pseudomonas fluorescens</i>    | 928                    |
| <i>Pseudomonas sp.</i>            | 767                    |
| <i>Pseudomonas trivialis</i>      | 609                    |
| <i>Flavobacterium johnsoniae</i>  | 553                    |
| <i>Methylobacterium mobilis</i>   | 236                    |
| <i>Cardinium endosymbiont</i>     | 183                    |
| <i>Pseudomonas poae</i>           | 69                     |
| <i>Sphingobacterium sp.</i>       | 60                     |
| <i>Pseudomonas brassicacearum</i> | 42                     |
| <i>Pseudomonas chlororaphis</i>   | 34                     |
| <i>Pseudomonas fragi</i>          | 33                     |
| <i>Pseudomonas mandelii</i>       | 25                     |
| <i>Pseudomonas putida</i>         | 25                     |
| <i>Chryseobacterium sp.</i>       | 21                     |



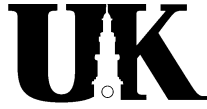

**Table 3. Missing sequences**

|                                                                                                                                                                                                                                                                                                                                                                                                                                                                                             |
|---------------------------------------------------------------------------------------------------------------------------------------------------------------------------------------------------------------------------------------------------------------------------------------------------------------------------------------------------------------------------------------------------------------------------------------------------------------------------------------------|
| >Gene7 locus=C60404577:235:387:-<br>ATGGACCAGATGCGCATTCAATTTTTAAAGCAAACCACTTCGCCTAGTTTTCGGAAAACCTTTGCTG<br>CAAATGATCGAACTAAGAGCAAGCAAGTGGGCTCTTCCAGTTGAAAGTATTATTTACTACTATCCT<br>AGCAATAGCCAAAAAAGTAA                                                                                                                                                                                                                                                                                       |
| >Gene5 locus=C60410339:723:1079:+<br>ATGACATCAACTAATTGGGCGCTTGCTGATGAATGTGCCATTGTTCCAATGAAGACAGATTTGAC<br>TGTTTCCACGCGGACCTTCCAACGAATCGGTTTGTACTCAACGAGGCTGTTGCTGGAAACCCACT<br>GAGAGCCGCACTGAAATGGATGGATTTAAGAACTGGATGTCCCTTGGTGTACTACCCAGTTGCT<br>TTTAAGTCGTACGAGCAGGTGAATAAAACAGTAGCCAATCATGTCACCACTGTCTTTCTGAGAAAT<br>GTTATTAAGTCACCCTATCCTGATGATGTGCCTCTTCTCAGAATGGTCATCAAAGCGGAATCCAAC<br>TTCAGGGTTCATGTTAAGGTGAGTTAA                                                                  |
| >Gene1 locus=C60412988:80:1241:+<br>ATGAATAATATAGATGTATTTTTCTACGTGCAATTTTTCAATTTCTCTCCTTGCTTTTTCAGTCTGAC<br>TTCAGCGGAAGAGTCGTTAATAACGACCATTTCTGTATTGGGGTGAAGTATCCAAAGCAACAGA<br>GGAAGGAGCGGAAATTCAGTTTCAAGTCATCGAGCAAACCTGAATTCATCGATGACGCATCCTTTCA<br>GCCATTTAAAGGTGGCAAATGGAGCCTTATATTAACGATGTGCGGCAGTCAAGTTGACATCAG<br>CAGAGAACTCATGTACATTTGTAATAATCAATTAGGTAAGTTCAGATTGTTGTAA                                                                                                           |
| >Gene2 locus=C60415092:393:1815:-<br>GCTAAAAACAGGTTGCAGAAGCTCTTGAAAAAATGATGCTGGAGAGATAAAATCTGCGAAAAA<br>TCGTGAAGTTTTGTATGACTCTTTACAAATAGCTCACAAATGCATCCTGAACTCTTTTTATGGTTAC<br>GTCATGCGGAAAGGCGCCAGATGGCATAGTATGGAGATGGCTGGAATAGTGTGTCACTGGAG<br>CTAATATCATCACAAGAGCTAGAGAAATCATTGAAAAAGTTGGTCGACCACTTGAATTAGATACAG<br>ATGGTATTTGGTGTGTTTTACCTGCATCTTTCCAGAAAATTATGTGATTAATTCCACACATCCGGG<br>CAAAGTAAAATTACCATCTCTTACCCAAATGCTGTACTGAATTCCATGGTGAAGGTAATTTTTGTT<br>GTGGTACATATATGTTCTTGCTAA |
| >Gene6 locus=C60415266:261:957:+<br>ATGTTGTCAGACTTTCTCTTCAGAGCTCCTGTTGATCACATCGTAAAACCTCCTCGTCAGTCAAGACG<br>TTCCTACATATATGTACGTCATGAATACAACGGTCAAGCTTTGCGCCTGCCTGAATGGAGGAAAT<br>ACCCTCACAACATCGAACATTACTTCTACTGGAGCACCCTTCATGGACACAGAATTTTTCCCTC<br>CAAGCGCCCATCTTGAAAGGAATATGTGGACGGACAATGATAGGAACATGAGTCACTTTTTCATGA<br>AAGCTTATTCAAACCTTTGCAAAATATGGGTAA                                                                                                                                |

Repetitive element analysis is a bit poor. No possibility to describe a bit more the different families of transposons?

**RESPONSE:** Revisions have been made according to reviewer’s suggestion.

The gene coverage section is short and difficult to follow (page 11 lines 10 and following).

**RESPONSE:** Revisions have been made according to reviewer’s suggestion (Table S15).

In the text, comparison of insect-symbionts system is very difficult to follow too.

**RESPONSE:** Revisions have been made according to reviewer’s suggestion (Figure 4).

Conclusion (at least as it is today) is not necessary: too long and redundant with the text.

**RESPONSE:** Revisions have been made according to reviewer’s suggestion.



UNIVERSITY OF KENTUCKY

College of Agriculture  
Department of Entomology  
Office of the State Entomologist  
S-225 Agriculture Science Center-N  
Lexington, KY 40546-0091

Figure 3: any possibility to put all the proteins present in the table within the figure/flow chart?

**RESPONSE: Revisions have been made according to reviewer's suggestion (Figure 3).**

Figure 4: I guess that the arrows showing the transfer of metabolites are not demonstrated but suggested by this work? Please mention it.

**RESPONSE: Please see revised figure legend.**

Figure 5: please improve the legends that are not clear and incomplete (e.g. what are the green boxes in 5B?).

**RESPONSE: Revisions have been made according to reviewer's suggestion.**

Figure S4, Table S3, Table S7, Table S9; not sure they are necessary

**RESPONSE: Figure S4, Table S3, Table S7 and Table S9 supported the statements in the manuscript. We, therefore, would like to keep these figure and tables in the supplementary materials.**

Please also take a moment to check our website at for any additional comments that were saved as attachments. Please note that as GigaScience has a policy of open peer review, you will be able to see the names of the reviewers.

**RESPONSE: According to reviewer's suggestion, we carried out additional experiments, reorganized and rewrote the manuscript.**

Thank you for your consideration and evaluation of this manuscript. We appreciate the opportunity to revise this manuscript for re-consideration, and we also thank the reviewers and editor for their careful review and constructive comments on the first manuscript draft.

With respect,

Xuguozhou "Joe" Zhou  
Associate Professor, Ph.D.  
Insect Integrative Genomics  
Department of Entomology  
University of Kentucky  
E-Mail: xuguozhou@uky.edu

Phone: 859-257-3125  
Fax: 859-323-1120
